# Supplementary material
Source: PubMed Central journal article supplement (PMC8548954)
Supplement: jama-e2116602-s001.pdf [file jama-e2116602-s001.pdf]

## Supplemental Online Content

Paget LDA, Reurink G, de Vos RJ, et al; for the PRIMA study group. Effect of Platelet-Rich Plasma Injections vs Placebo on Ankle Symptoms and Function in Patients With Ankle Osteoarthritis. *JAMA*. Published online October 26, 2021. doi:10.1001/jama.2021.16602

### **Supplement 1.** Trial protocol and statistical analysis plan

This supplemental material has been provided by the authors to give readers additional information about their work.

# **Supplement**

## **Study Protocol and Statistical Analysis Plan**

Supplement to:

Liam D.A. Paget, M.D., Gustaaf. Reurink, M.D., Ph.D., Robert-Jan de Vos, M.D., Ph.D., et al Platelet-Rich Plasma Injections for Ankle Osteoarthritis

This supplement contains the following items:

1.
  - a. Original protocol (IRB approved protocol version 4.0 27-07-2018; inclusion first patient 21-04-2020): Adobe pdf page 2-26
  - b. Final protocol (Amendment due to COVID-19 pandemic: IRB approved protocol version 5.0 21-04-2020), Adobe pdf page 27-53
  - c. Summary of changes, Adobe pdf page 54
  
2. Original statistical analysis plan, final statistical analysis plan, summary of changes.
  - a. Original Statistical Analysis Plan (date ): Adobe pdf page 55-70
  - b. Final Statistical Analysis Plan (date): Adobe pdf page 71-91
  - c. Summary of changes, Adobe pdf page 92

**Platelet Rich plasma Injection Management for Ankle osteoarthritis study (PRIMA): A multi-center,  
stratified, block-randomized, double-blind, placebo-controlled trial**

**Version 4**

This submission is based on the formerly approved studies (same PI) evaluating the efficacy of platelet rich plasma in musculoskeletal injuries:

- Chronic achilles tendinopathy by de Vos et al. JAMA 2010 (PRICT-study, registration NTR1420, ABR NL 22805.098.08).[1]
- Acute hamstring injuries by Reurink et al. NEJM 2014 (HIT-study registration NTR2771, NL34660.098.10 / 10-163; ABR / METC Zuidwest Holland).[2]

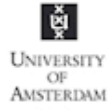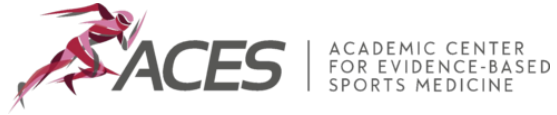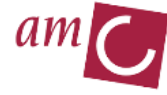

**PROTOCOL TITLE:** Platelet Rich plasma Injection Management for Ankle osteoarthritis study (PRIMA):

A multi-center, stratified, block-randomized, double-blind, placebo-controlled trial

|                                                                           |                                                                                                                                                                                                                                                                                                                                                                                                                                                               |
|---------------------------------------------------------------------------|---------------------------------------------------------------------------------------------------------------------------------------------------------------------------------------------------------------------------------------------------------------------------------------------------------------------------------------------------------------------------------------------------------------------------------------------------------------|
| <b>Protocol ID</b>                                                        | NL64160.018.18                                                                                                                                                                                                                                                                                                                                                                                                                                                |
| <b>Short title</b>                                                        | <b>PRIMA</b>                                                                                                                                                                                                                                                                                                                                                                                                                                                  |
| <b>Version</b>                                                            | <b>4</b>                                                                                                                                                                                                                                                                                                                                                                                                                                                      |
| <b>Date</b>                                                               | <b>13-06-2018</b>                                                                                                                                                                                                                                                                                                                                                                                                                                             |
| <b>Coordinating investigator/project leader</b>                           | L. D. A. Paget<br><br>Academic Medical Centre, Meidreef 9, 1105AZ,<br>Amsterdam<br><br>T: 06 421 448 51   <a href="mailto:Ld.paget@amc.uva.nl">Ld.paget@amc.uva.nl</a>                                                                                                                                                                                                                                                                                        |
| <b>Principal investigator(s) (in Dutch: hoofdonderzoeker/ uitvoerder)</b> | Dr. J. L. Tol<br><br>Academic Medical Center, Meidreef 9, 1105AZ,<br>Amsterdam<br><br>Academic Center for Evidence Based Sports Medicine<br><br>AMC - Orthopedic surgery<br><br>T: 020 5662955   <a href="mailto:J.L.Tol@amc.uva.nl">J.L.Tol@amc.uva.nl</a>                                                                                                                                                                                                   |
| <b>Co-investigators</b><br>Academical Medical Center                      | Prof. dr. G Kerkhoffs<br><a href="mailto:g.m.kerkhoffs@amc.nl">g.m.kerkhoffs@amc.nl</a><br>AMC - Orthopedic surgery<br><br>Prof. dr. M. Maas<br><a href="mailto:m.maas@amc.nl">m.maas@amc.nl</a><br>AMC - Radiology<br><br>Dr. G. Reurink<br><a href="mailto:g.reurink@amc.uva.nl">g.reurink@amc.uva.nl</a><br>AMC - Orthopedic surgery<br><br>Dr S. Stufkens<br><a href="mailto:s.stufkens@amc.uva.nl">s.stufkens@amc.uva.nl</a><br>AMC - Orthopedic surgery |

|                                                         |                                                                                                                                                                                                                                                                |
|---------------------------------------------------------|----------------------------------------------------------------------------------------------------------------------------------------------------------------------------------------------------------------------------------------------------------------|
| Erasmus Medical Center                                  | <p>Prof. dr. S.M.A. Bierma – Zeinstra<br/>s.bierma-zeinstra@erasmusmc.nl<br/>EMC - Orthopedic surgery</p> <p>Dr. A. Weir<br/>a.weir@erasmusmc.nl<br/>EMC - Orthopedic surgery</p> <p>Dr. R.J. De Vos<br/>r.devos@erasmusmc.nl<br/>EMC - Orthopedic surgery</p> |
| Flevoziekenhuis                                         | <p>Dr. R. Krips<br/>r.krips@flevoziekenhuis.nl<br/>Flevoziekenhuis - Orthopedic surgery</p>                                                                                                                                                                    |
| Bergman Clinics                                         | <p>Dr. M. H.Moen<br/>m.moen@bergman.nl<br/>mh_moen@hotmail.com<br/>Sports Medicine</p>                                                                                                                                                                         |
| OLVG                                                    | <p>Dr S. Goedegebuure<br/>simongoedegebuure@desportartsengroep.nl;<br/>Sports Medicine</p>                                                                                                                                                                     |
| <b>Sponsor (in Dutch:<br/>verrichter/opdrachtgever)</b> | <p>Academic Center for Evidence-based Sports Medicine<br/>Academic Medical Centre,<br/>Meibergdreef 9, 1105AZ, Amsterdam</p>                                                                                                                                   |
| <b>Subsidising party</b>                                | Reumafonds                                                                                                                                                                                                                                                     |
| <b>Independent expert (s)</b>                           |                                                                                                                                                                                                                                                                |
| Academical Medical Center                               | P. A. Struijs                                                                                                                                                                                                                                                  |
| Erasmus Medical Center                                  | K. Bos                                                                                                                                                                                                                                                         |
| Flevoziekenhuis                                         | P. de Leeuw                                                                                                                                                                                                                                                    |
| Bergman Clinics                                         | J. de Poorter                                                                                                                                                                                                                                                  |
| OLVG                                                    | N. Wijne                                                                                                                                                                                                                                                       |

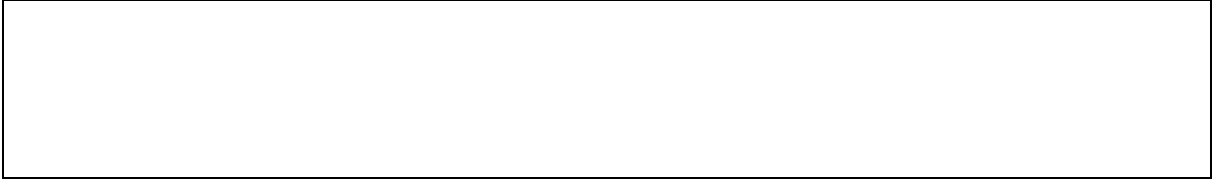

## Table of Contents

This submission is based on the formerly approved studies (same PI) evaluating the efficacy of platelet rich plasma in musculoskeletal injuries: ..... 1

- Chronic achilles tendinopathy by de Vos et al. JAMA 2010 (PRICT-study, registration NTR1420, ABR NL 22805.098.08).[1] ..... 1
- Acute hamstring injuries by Reurink et al. NEJM 2014 (HIT-study registration NTR2771, NL34660.098.10 / 10-163; ABR / METC Zuidwest Holland).[2]..... 1

|     |                                                       |    |
|-----|-------------------------------------------------------|----|
| 1.  | INTRODUCTION AND RATIONAL .....                       | 12 |
| 1.1 | Clinical relevance of ankle OA .....                  | 12 |
| 1.2 | Pathomechanisms of OA.....                            | 12 |
| 1.3 | Pain pathomechanism .....                             | 12 |
| 1.4 | Non-surgical interventions for ankle-OA.....          | 12 |
| 1.5 | PRP in OA – animal models .....                       | 13 |
| 1.6 | PRP in OA – clinical studies .....                    | 13 |
| 1.7 | Why this proposal will have a great impact .....      | 13 |
| 2.  | Study Goal .....                                      | 13 |
| 2.1 | Hypothesis .....                                      | 14 |
| 3.  | STUDY DESIGN.....                                     | 14 |
| 4.  | STUDY POPULATION.....                                 | 14 |
| 4.1 | Population (base).....                                | 14 |
| 4.2 | Inclusion criteria.....                               | 14 |
| 4.3 | Exclusion criteria .....                              | 14 |
| 4.4 | RADIOGRAPHS.....                                      | 15 |
| 4.5 | Sample size calculation .....                         | 15 |
| 5.  | INTERVENTION.....                                     | 15 |
| 5.1 | Intervention .....                                    | 15 |
| 5.2 | PRP preparation .....                                 | 16 |
| 5.3 | Use of co-intervention .....                          | 16 |
| 6.  | METHODS.....                                          | 16 |
| 6.1 | Main study parameter/endpoint .....                   | 16 |
| 6.2 | Secondary study parameters/endpoints.....             | 16 |
| 6.3 | Randomization, blinding and treatment allocation..... | 17 |
| 6.4 | Study procedures .....                                | 17 |
| 6.5 | Inclusion .....                                       | 18 |



|       |                                                               |    |
|-------|---------------------------------------------------------------|----|
| 6.6   | Replacement of individual subjects after withdrawal .....     | 18 |
| 6.7   | Statistical analysis.....                                     | 18 |
| 6.8   | Economic analysis.....                                        | 19 |
| 7.    | ETHICAL CONSIDERATIONS .....                                  | 19 |
| 7.1   | Informed consent .....                                        | 19 |
| 7.2   | Benefits and risk assessment, group relatedness .....         | 19 |
| 7.3   | Incentives .....                                              | 20 |
| 8.    | SAFETY REPORTING.....                                         | 20 |
| 8.1   | Temporary halt for reasons of subject safety .....            | 20 |
| 8.2   | AEs, SAEs and SUSARs.....                                     | 20 |
| 8.2.1 | Adverse events (AEs).....                                     | 20 |
| 8.2.2 | Serious adverse events (SAEs) .....                           | 20 |
| 8.2.3 | Suspected unexpected serious adverse reactions (SUSARs) ..... | 21 |
| 8.3   | Follow-up of adverse events .....                             | 22 |
| 9.    | ADMINISTRATIVE ASPECTS, MONITORING AND PUBLICATION.....       | 22 |
| 9.1   | Handling and storage of data .....                            | 22 |
| 9.2   | Monitoring and Quality Assurance.....                         | 23 |
| 9.3   | Amendments .....                                              | 23 |
| 9.4   | Publication .....                                             | 23 |
| 10.   | References .....                                              | 24 |

## **LIST OF ABBREVIATIONS AND RELEVANT DEFINITIONS**

|                |                                                                                                                                                                                                                                                                                                                                                  |
|----------------|--------------------------------------------------------------------------------------------------------------------------------------------------------------------------------------------------------------------------------------------------------------------------------------------------------------------------------------------------|
| <b>ABR</b>     | <b>ABR form, General Assessment and Registration form, is the application form that is required for submission to the accredited Ethics Committee (In Dutch, ABR = Algemene Beoordeling en Registratie)</b>                                                                                                                                      |
| <b>AE</b>      | <b>Adverse Event</b>                                                                                                                                                                                                                                                                                                                             |
| <b>AR</b>      | <b>Adverse Reaction</b>                                                                                                                                                                                                                                                                                                                          |
| <b>CA</b>      | <b>Competent Authority</b>                                                                                                                                                                                                                                                                                                                       |
| <b>CCMO</b>    | <b>Central Committee on Research Involving Human Subjects; in Dutch: Centrale Commissie Mensgebonden Onderzoek</b>                                                                                                                                                                                                                               |
| <b>CV</b>      | <b>Curriculum Vitae</b>                                                                                                                                                                                                                                                                                                                          |
| <b>DSMB</b>    | <b>Data Safety Monitoring Board</b>                                                                                                                                                                                                                                                                                                              |
| <b>EU</b>      | <b>European Union</b>                                                                                                                                                                                                                                                                                                                            |
| <b>EudraCT</b> | <b>European drug regulatory affairs Clinical Trials</b>                                                                                                                                                                                                                                                                                          |
| <b>GCP</b>     | <b>Good Clinical Practice</b>                                                                                                                                                                                                                                                                                                                    |
| <b>IB</b>      | <b>Investigator's Brochure</b>                                                                                                                                                                                                                                                                                                                   |
| <b>IC</b>      | <b>Informed Consent</b>                                                                                                                                                                                                                                                                                                                          |
| <b>IMP</b>     | <b>Investigational Medicinal Product</b>                                                                                                                                                                                                                                                                                                         |
| <b>IMPD</b>    | <b>Investigational Medicinal Product Dossier</b>                                                                                                                                                                                                                                                                                                 |
| <b>METC</b>    | <b>Medical research ethics committee (MREC); in Dutch: medisch ethische toetsing commissie (METC)</b>                                                                                                                                                                                                                                            |
| <b>NSAID's</b> | <b>Non-Steroidal Anti-Inflammatory Drugs</b>                                                                                                                                                                                                                                                                                                     |
| <b>OA</b>      | <b>Osteoarthritis</b>                                                                                                                                                                                                                                                                                                                            |
| <b>OCD</b>     | <b>Osteochondral Defect</b>                                                                                                                                                                                                                                                                                                                      |
| <b>PRP</b>     | <b>Platelet-Rich Plasma</b>                                                                                                                                                                                                                                                                                                                      |
| <b>(S)AE</b>   | <b>(Serious) Adverse Event</b>                                                                                                                                                                                                                                                                                                                   |
| <b>SPC</b>     | <b>Summary of Product Characteristics (in Dutch: officiële productinformatie IB1-tekst)</b>                                                                                                                                                                                                                                                      |
| <b>Sponsor</b> | <b>The sponsor is the party that commissions the organisation or performance of the research, for example a pharmaceutical company, academic hospital, scientific organisation or investigator. A party that provides funding for a study but does not commission it is not regarded as the sponsor, but referred to as a subsidising party.</b> |
| <b>SUSAR</b>   | <b>Suspected Unexpected Serious Adverse Reaction</b>                                                                                                                                                                                                                                                                                             |
| <b>Wbp</b>     | <b>Personal Data Protection Act (in Dutch: Wet Bescherming Persoonsgegevens)</b>                                                                                                                                                                                                                                                                 |
| <b>WMO</b>     | <b>Medical Research Involving Human Subjects Act (in Dutch: Wet Medisch-wetenschappelijk Onderzoek met Mensen)</b>                                                                                                                                                                                                                               |

## **SUMMARY**

Pain is the cardinal symptom of ankle osteoarthritis (OA) and is a complex phenomenon with limited understanding of its pathomechanisms. The main objectives in the clinical management of OA are to reduce inflammation and cartilage degeneration processes as well as relieve pain. Platelet-rich plasma (PRP) is a high concentrate of platelets derived from patient's whole blood, centrifuged to remove red blood cells. PRP has been used to encourage a healing response across several specialties, in particular dentistry, orthopaedics and dermatology. Growth factors stored in the platelets are assumed to facilitate an anti-inflammatory and analgesic effect.

A recent review concluded that in animal models PRP can diminish multiple inflammatory IL-1 mediated effects, and can also positively influence the collagen network of the cartilage and subsequently reduce pain and improve function.[3]

Our recent and other systematic reviews showed that compared to placebo injections, hyaluronic acid or corticosteroid injections, PRP injections significantly decrease pain and improve function in knee OA patients.[4–6] Given the clinical effect on pain reduction in knee OA and safety, PRP might serve as a promising non-surgical therapy for ankle OA. PRP might potentially delay the irreversible surgical options like arthrodesis and joint replacement. No significant adverse events have been reported for any PRP trials regarding acute hamstring injuries, Achilles tendinopathy, knee OA and specifically not ankle OA. [1,2,4,5,7–9]. Until present, there is no RCT conducted on the efficacy of PRP in the management of ankle OA.

## **Hypothesis**

We hypothesize that:

PRP injections are efficacious for symptom reduction and functional improvement compared to placebo injections in the treatment of ankle (talocrural) OA.

## **Workplan**

### **Study design**

A multi-center, stratified, block-randomized, double-blind, placebo-controlled trial comparing two treatment groups.

### **Study population**

Patients with ankle (talocrural) OA will be included if they meet the following 3 inclusion criteria:

1. Severity of Ankle OA pain on visual analogue scale (VAS) (0–100 mm)  $\geq$  40 during daily activities
2. X-rays (AP and lateral view) indicating  $\geq$  grade 2 on the Van Dijk classification [10]
3. Age  $\geq$  18 years

### **Intervention**

Patients will be randomised into two treatment groups: PRP injection or placebo (saline) injection. Both groups will receive two injections of PRP or placebo at an interval of 6 weeks.

### **Main study parameter/endpoint**

American Orthopaedic Foot and Ankle Society (AOFAS) score at 26 weeks follow-up, validated scale for ankle OA (0-100) measuring three subdomains (pain, function and alignment).

After 26 weeks, the principal investigator will be unblinded after the analysis of the primary outcome. The patients will remain blinded to the therapy until 52 weeks follow-up.

### **Power analysis**

Based on previous and ongoing studies, the study protocol of the randomised controlled trial is designed to detect a difference of 12 points (0-100) on the AOFAS score (minimal clinical relevant difference) between the groups.[11] Based on a previous placebo controlled RCT on injection therapy (hyaluronic acid) in ankle OA of DeGroot et al. a standard deviation of 16.3 can be expected. Taking into account a two-sided level of significance of 5%, a power of 90% and a dropout rate of 15%, approximately 50 (40 plus 15%) patients per group will be needed (N=100).[11]

### **STATISTICAL ANALYSIS**

To test for the effect of treatment on the between-group difference in primary outcome, we will use a repeated measurements general linear model. The effect of potential confounders (varus/valgus) will be evaluated and a correction will be performed.

### **Expected results**

We will provide evidence for the (potential) efficacy of PRP for symptom reduction and functional improvement in the treatment of ankle OA. A positive outcome will have an effect on the economical and disease burden. The relatively simple content and widespread availability of the PRP intervention and previously reported good safety will contribute to simple and optimal nationwide implementation.

## **Conclusion**

Our project will provide conclusions on the efficacy of PRP in ankle OA.

## **1. INTRODUCTION AND RATIONAL**

### **1.1 Clinical relevance of ankle OA**

The reported incidence of symptomatic ankle OA is estimated at 1% to 4% in the general adult population.[12] Due to its onset at a relatively young age, the duration of ankle OA in the life of a patient is significantly longer than those with hip or knee OA and the available surgical intervention (arthrodesis) is associated with significant functional limitations. In contrast to hip and knee OA, where there is an excellent surgical alternative (joint replacement) for severe cases, there is a clear need for non-surgical successful interventions in ankle OA.

Health related quality of life and physical function limitations are severe and comparable with hip OA and end-stage kidney disease or congestive heart failure.[14]

### **1.2 Pathomechanisms of OA**

Following pathological or traumatic injury of the hyaline cartilage, progressive catabolic chondrocyte activity leads to degenerative osteoarthritic joint changes. Two key characteristics of OA are the lack of regenerative activity of the chondrocytes and the inflammatory joint reaction.

### **1.3 Pain pathomechanism**

Pain is the cardinal symptom in OA and it is a complex phenomenon of which we understand only a fraction of the pathomechanisms.[15] One of the major peripheral factors considered as being an important source of pain is joint inflammation. Previous studies showed that local inflammation, with the release of phospholipases, cyclooxygenases and leukotrienes, is involved in pain mechanisms.[15] These factors not only result in increased intra-articular pressure due to edema, but also induce the amount of nociceptors present with subsequent excitation of peripheral nerves.[15,16]

### **1.4 Non-surgical interventions for ankle-OA**

The main objectives in the clinical management of OA are to reduce the inflammatory and cartilage degeneration processes, and to relieve pain.

At this time there is no evidence-based treatment algorithm for non-surgical management of ankle OA.[2,5,17,18] Several pain relief options, such as non-steroidal anti-inflammatory drugs, opioids and corticosteroid as well as hyaluronic acid injections, are available but there is a lack of evidence from high quality studies to assist in clinical decision-making.

### **1.5 PRP in OA – animal models**

Platelet Rich Plasma (PRP) is defined as plasma containing a concentration of at least 1,000,000 platelets/ $\mu$ l. Growth factors (GF) are stored in  $\alpha$ -granules within platelets, and are released in a selective manner upon activation. GF released from the  $\alpha$ -granules of platelets are assumed to provide the regenerative and anti-inflammatory benefits of PRP.

Recent reviews concluded that in animal models, PRP can diminish multiple inflammatory IL-1 mediated effects.[3] Due to this local anti-inflammatory response, PRP might have an indirect analgesic effect. The second suggested effect might be an increased mRNA expression of proteoglycan core protein in the articular cartilage and decreased chondrocyte apoptosis.[3] Consequently, PRP could also positively influence the collagen network of the cartilage.

### **1.6 PRP in OA – clinical studies**

Several systematic reviews have shown that compared to placebo injections, hyaluronic acid or corticosteroid injections, PRP injections significantly decrease pain, improve function and are simple and safe.[5,18] In the majority of studies, the patients received 2-3 injections at fixed intervals. Given its clinical effect on pain reduction in OA and safety, PRP therapy in ankle OA might serve as a distinct non-surgical therapy for reducing pain and improving function. Clinical studies on the use of PRP in ankle OA are limited to a single report of 5 cases, which showed significant reduction of the VAS-FA score at a mean of 16 months follow-up.[17] Our preliminary results on the outcome of PRP injection in 14 patients with van Dijk Grade 2 ankle OA, revealed that 64% reported improvement of their symptoms. A lack of validated outcome scores, low quality study designs and small sample sizes are the main limitations of these previously conducted studies.

### **1.7 Why this proposal will have a great impact**

The strength and uniqueness of our project is that: We will evaluate the promising findings from animal studies and positive clinical observations of PRP in ankle OA patients in a Level 1 study.

## **2. Study Goal**

The goal of this study is to determine the efficacy of PRP injections in the management of ankle osteoarthritis by comparing 2 groups, both receiving 2 injections of either: PRP or a placebo saline solution.

## **2.1 Hypothesis**

We hypothesize that: PRP injections are efficacious for symptom reduction and functional improvement compared to placebo injections in the treatment of ankle (talocrural) OA

## **3. STUDY DESIGN**

A multi-center, stratified, block-randomized, double-blind, placebo-controlled trial comparing two treatment groups.

## **4. STUDY POPULATION**

### **4.1 Population (base)**

Patients with ankle OA in two University Medical Centres (Erasmus MC, AMC), teaching hospital (OLVG), general hospital (Flevo Hospital) and focus clinic (Bergman Clinic) will be informed about the study.

### **4.2 Inclusion criteria**

1. Severity of Ankle OA pain on a visual analogue scale (VAS) (0–100 mm)  $\geq$  40 during daily activities
2. X-rays (AP and lateral view) indicating  $\geq$  grade 2 on the Van Dijk classification[10]
3. Age  $\geq$  18 years

### **4.3 Exclusion criteria**

1. Patient has received injection therapy for ankle OA in the previous 6 months
2. Patient does not want to receive one of the two therapies
3. Patient has clinical signs of concomitant OA of one or more other major joints of the lower extremities that negatively affects their daily activity level
4. Previous ankle surgery for OA or Osteochondral defects (OCD)  $<$  1 year (not including surgery for an ankle fracture in the past)



#### **4.4 RADIOGRAPHS**

AP and lateral X-rays of the ankles will be scored according to the Van Dijk classification:[10]

- 0 Normal joint or subchondral sclerosis
- I Osteophytes without joint space narrowing
- II Joint space narrowing with or without osteophytes
- III (Sub)total disappearance or deformation of the joint space

#### **4.5 Sample size calculation**

Based on previous and ongoing studies, the study protocol of the randomised controlled trial is designed to detect a difference of 12 points (0-100) on the AOFAS score (minimal clinical relevant difference) between the groups.[11] Based on a previous placebo controlled RCT on injection therapy (hyaluronic acid) in ankle OA of DeGroot et al. a standard deviation of 16.3 can be expected. Taking into account a two-sided level of significance of 5%, a power of 90% and a dropout rate of 15%, approximately 50 (40 plus 15%) patients per group will be needed (N=100).[11]

### **5. INTERVENTION**

#### **5.1 Intervention**

In this study, patients will be randomised into two treatment groups: PRP injection or placebo saline injection. Treatment allocation will be concealed. One syringe of 15ml autologous blood will be collected twice from the cubital vein: at inclusion and at a time interval of approximately 6 weeks. All participants will receive a second injection, regardless of the effect of the first injection. This blood will be prepared according to the instructions of the manufacturer (see appendix F4 Protocol bloedafname - PRP bereiden - intra-articulair injectie enkel), and the injection will be given within 30 minutes following venipuncture. For each injection 2 ml will be injected into the affected ankle joint under ultrasonographic guidance. The control group will follow the exact same protocol of venipuncture and preparation of the PRP, but instead of PRP, 2ml physiological saline will be injected on both occasions. To guarantee blinding for the allocated treatment of the patient, treatment assessor and treating physician, blood will be drawn and PRP will be prepared for each patient during both injections (at inclusion and at a time interval of 6 weeks after the first injection). An unblinded research assistant will prepare an injection with either PRP or physiological saline. The injection will be blinded by a specially manufactured covering sheath in order to conceal randomisation. Following the intra-articular injection, the sheath (containing either the remnants of the PRP or saline), will be directly handed to the unblinded research assistant, who will immediately dispose of the syringe, therefore keeping the physician and coordinating researcher blinded.

## **5.2 PRP preparation**

This blood will be prepared according to the instructions of the manufacturer (see appendix F4 Protocol bloedafname - PRP bereiden - intra-articulair injectie enkel). The same method was used in a RCT on acute hamstring injuries by Reurink et al, 2014 NEJM.[2] For each patient the coordinating researcher will prepare a PRP and a placebo injection (isotonic saline: 0.9% sodium chloride).

Prior to commencement of the study, the coordinating researcher was trained by a representative of Arthrex, as well as two experienced members of the PRIMA trial research group (dr. G Reurink en dr. RJ de Vos ) with a vast experience regarding PRP preparation and injection. The PRP will be prepared using a widely used and commercial available system (Arthrex double syringe PRP system, Arthrex Medizinische Instrumente GmbH, Garching, Germany). Quality of the system meets internationally accepted standards according to the international organization for standardization standard (ISO13485 medical devices). Further CE certificates are in the appendix (D2). One syringe of approximately 15ml of venous blood will be collected from the cubital vein. After blood collection the syringe will undergo 5 minutes of centrifugation. Further reference regarding injection instructions and sterility procedure to be found in appendix F4 Protocol bloedafname - PRP bereiden - intra-articulair injectie enkel.

## **5.3 Use of co-intervention**

Patients are instructed to avoid the use of co-interventions and NSAID's 24 hours prior to the intervention and during the follow-up period. Throughout the study, any co-interventions (including usual care: exercise therapy and healthy life style advice) used by participants will be registered, such as NSAID's, other analgesic drugs, intra-articular injections or inlays.

## **6. METHODS**

### **6.1 Main study parameter/endpoint**

1. American Orthopaedic Foot and Ankle Society (AOFAS) score at 26 weeks follow-up, validated scale for ankle OA (0-100) measuring three subdomains (pain, function and alignment).

### **6.2 Secondary study parameters/endpoints**

Main secondary outcome:

1. Pain scores: (VAS 0-100) during activities of daily living and the pain sub-scale of AOFAS (0-40)
2. Ankle activity score (0-10)
3. Subjective patient satisfaction (4 categories)
4. Health related quality of life (SF-36 scale)

5. The Global Attainment Scaling (GAS)
6. EQ-5D-3L utility score
7. Ankle Osteoarthritis Score (AOS)
8. Foot and Ankle Outcome Score (FAOS)

### **6.3 Randomization, blinding and treatment allocation**

In line with our previously conducted multicenter RCT, patients will be included at the centre of their first outpatient clinic appointment.[2] For each patient the coordinating researcher prepared a syringe with PRP and a syringe with placebo (isotonic saline: 0.9% sodium chloride). CASTOR<sup>redc</sup> will be used to perform a computer generated block randomisation scheme with patients stratified to center with a variable block size of two, four or six. The coordinating researcher remains blinded to the allocated intervention. An independent researcher from the coordinating location will have access to the randomization result and the allocated intervention. This will be relayed to a research assistant. The research assistant then selects one of the two syringes based on the allocated intervention and blinds the syringe with a covering sheath. The patients, physicians, and coordinating researcher will all be blinded to the allocation of the intervention and to the contents of the syringe. The success of blinding will be assessed by asking participants which injection they think they have received, this will then be registered accordingly. In the event of questions or problems that cannot be answered or solved by the treating physician or coordinating researcher, patients may contact the independent physician.

After the 26 weeks follow-up of the last patient in the study, the principal investigator and coordinating researcher will be unblinded only after the analysis of the primary outcome. The patients will remain blinded to the therapy until the 52 weeks follow-up (online questionnaire) of the last patient in the study. At 52 weeks follow-up, a second blinded researcher will evaluate the patients using the outcome measurements.

### **6.4 Study procedures**

Following x-ray imaging performed under usual patient care, in the event the patient meets the criteria for inclusion and exclusion, he or she will be informed in more detail about the study procedure. At that time the patient can ask questions about the study and decide whether they will participate. The patient has no maximum time limit to consider participation and may proceed to sign the informed consent form. Subsequently the patient will proceed to inclusion and the randomization procedure.

## 6.5 Inclusion

Patients are recruited for inclusion by their treating physicians at location. An AP and lateral view X-ray will be performed at baseline prior to inclusion to the PRIMA trial. Following inclusion PRP will be prepared according to the PRP system instructions of the manufacturer (see supplement 1). During the first two consultations a total of two intra-articular injections will be documented. The patient will have no additional costs as a result of taking part in this study.

Follow-up will be at 6, 12, 26, 39, 52 weeks and 5 years (Questionnaires will be managed and distributed digitally using a GCP approved data management system (Castor EDC). The time points and outcome measurements are described below:

6 weeks:

- Standard follow-up questionnaires, physical examination (see appendix F1 & F4)
- Second PRP or normal saline placebo injection

12 weeks:

- Standard follow-up questionnaires and PRODISQ questionnaire (see appendix F1 & F4)

26 weeks:

- Standard follow-up questionnaires, PRODISQ questionnaire and physical examination (see appendix F1 & F4)

39 weeks:

- PRODISQ questionnaire (see appendix F1)

52 weeks:

- Standard follow-up questionnaires, PRODISQ questionnaire (see appendix F1 & F4)

## 6.6 Replacement of individual subjects after withdrawal

In the sample size calculation we compensated for an expected loss of 10% of patients to follow-up. No patients will be replaced after withdrawal.

## 6.7 Statistical analysis

The statistical analysis of the primary outcome measure will be blinded using only the blinded codes of the randomisation groups. To test for the effect of treatment on the between-group difference in primary outcome, we will use the repeated measurement general linear model. Changes from baseline to all follow-up time points will be included in the model. Adjustments will be made for those variables that influenced the primary outcome with  $P < 0.10$ . However, both adjusted and unadjusted results will be presented. Logistic and linear regression analyses will be used for

respectively binary and numerical secondary outcome parameters. Our analysis will include imputation for missed data and sensitivity analysis.

## **6.8 Economic analysis**

In the event of a positive significant outcome, an economic analysis is needed to support a possible change of practice. An economic analysis (costs) will be performed in order to determine cost-effectiveness. Consequently, the amount of symptom reduction may be related to cost-effectivity of PRP injection treatment. The analysis will be based on indirect costs and direct costs and will be determined using the PRODISQ questionnaire. The PRODISQ questionnaire is taken at baseline and every 3 months thereafter up until 1 year. The cost-effectivity analysis occurs at 1 year. The PRODISQ questionnaire is submitted in the Appendix (F1).

## **7. ETHICAL CONSIDERATIONS**

This study will be conducted in accordance with the Declaration of Helsinki and the Personal Data Protection Act (Wbp). The AMC medical ethical committee will judge whether the study meets the criteria for the Medical Research involving Human subjects act (WMO).

### **7.1 Informed consent**

When patients wish to participate in the trial, he or she will be asked to fill in a written informed consent form.

### **7.2 Benefits and risk assessment, group relatedness**

When compared to OA of the knee and hip, ankle OA is more common in the relatively young and active population, with the highest incidence in females. Health related quality of life and physical functioning is comparable with hip OA and end-stage kidney disease or congestive heart failure.[14] This relatively young (female) ankle OA population is at increased risk for decreased work participation and family care. In the absence of evidence-based non-surgical interventions, a positive outcome will have an impact on the economical (if cost-effective) and disease burden of this prevalent disease. The relatively simple content and widespread availability of the intervention and previously reported good safety will contribute to simple and optimal nationwide implementation.

Complications have not been observed in previous studies with PRP injections having been performed on different muscle and tendon injuries as well as intra-articular injections of the knee and ankle. Although no adverse effects have been previously reported, no guarantee can be given.

Experiences from experts in clinical practise using intra-articular PRP injections indicate that approximately 10% of participants experience some mild joint pain up to 3 weeks following the PRP injection. On inclusion, participants will undergo ankle x-rays as would normally have been the case had they not participated in the study.

A negative outcome (no effect of PRP) will prevent the widespread use of a non-efficacious treatment on patients. Our previous PRP RCTs have shown that initially one high quality study will have an enormous impact on clinical application and negates the need for starting low quality studies (as it evolved in knee OA PRP studies).

### **7.3 Incentives**

In the event of additional visits related to the study, travel compensation will be granted.

## **8. SAFETY REPORTING**

### **8.1 Temporary halt for reasons of subject safety**

In accordance to section 10, subsection 1, of the WMO (<http://www.ccmo.nl/attachments/files/wmo-engelse-vertaling-29-7-2013-afkomstig-van-vws.pdf>), the sponsor (AMC) will suspend the study if there is sufficient ground that continuation of the study will jeopardise subject health or safety. The sponsor will notify the accredited METC without undue delay of a temporary halt including the reason for such an action. The study will be suspended pending a further positive decision by the accredited METC. The investigator will take care that all subjects are kept informed.

### **8.2 AEs, SAEs and SUSARs**

#### **8.2.1 Adverse events (AEs)**

Adverse events are defined as any undesirable experience occurring to a subject during the study, whether or not considered related to the intervention. All adverse events reported spontaneously by the subject or observed by the investigator or his staff will be recorded.

#### **8.2.2 Serious adverse events (SAEs)**

A serious adverse event is any untoward medical occurrence or effect that

- results in death;
- is life threatening (at the time of the event);
- requires hospitalisation or prolongation of existing inpatients' hospitalisation;
- results in persistent or significant disability or incapacity;
- is a congenital anomaly or birth defect; or
- any other important medical event that did not result in any of the outcomes listed above due to medical or surgical intervention but could have been based upon appropriate judgement by the investigator.

An elective hospital admission will not be considered as a serious adverse event.

The investigator will report all SAEs to the sponsor without undue delay after obtaining knowledge of the events.

The sponsor will report the SAEs through the web portal *ToetsingOnline* to the accredited METC that approved the protocol, within 7 days of first knowledge for SAEs that result in death or are life threatening followed by a period of maximum of 8 days to complete the initial preliminary report. All other SAEs will be reported within a period of maximum 15 days after the sponsor has first knowledge of the serious adverse events.

### **8.2.3 Suspected unexpected serious adverse reactions (SUSARs)**

Adverse reactions are all untoward and unintended responses to an investigational product related to any dose administered.

Unexpected adverse reactions are SUSARs if the following three conditions are met:

1. the event must be serious (see chapter 9.2.2);
2. there must be a certain degree of probability that the event is a harmful and an undesirable reaction to the medicinal product under investigation, regardless of the administered dose;
3. the adverse reaction must be unexpected, that is to say, the nature and severity of the adverse reaction are not in agreement with the product information as recorded in:
  - Summary of Product Characteristics (SPC) for an authorised medicinal product;
  - Investigator's Brochure for an unauthorised medicinal product.

The sponsor will report expedited the following SUSARs through the web portal *ToetsingOnline* to the METC.

- SUSARs that have arisen in the clinical trial that was assessed by the METC;
- SUSARs that have arisen in other clinical trials of the same sponsor and with the same medicinal product, and that could have consequences for the safety of the subjects involved in the clinical trial that was assessed by the METC.

The remaining SUSARs are recorded in an overview list (line-listing) that will be submitted once every half year to the METC. This line-listing provides an overview of all SUSARs from the study medicine, accompanied by a brief report highlighting the main points of concern. The expedited reporting of SUSARs through the web portal Eudravigilance or *ToetsingOnline* is sufficient as notification to the competent authority.

The sponsor will report expedited all SUSARs to the competent authorities in other Member States, according to the requirements of the Member States.

The expedited reporting will occur not later than 15 days after the sponsor has first knowledge of the adverse reactions. For fatal or life threatening cases the term will be maximal 7 days for a preliminary report with another 8 days for completion of the report.

### **8.3 Follow-up of adverse events**

All AEs will be followed until they have abated, or until a stable situation has been reached.

Depending on the event, follow up may require additional tests or medical procedures as indicated, and/or referral to the general physician or a medical specialist.

SAEs need to be reported till end of study within the Netherlands, as defined in the protocol

## **9. ADMINISTRATIVE ASPECTS, MONITORING AND PUBLICATION**

### **9.1 Handling and storage of data**

After giving permission for participating in this study, participants will receive a link to fill in surveys and their informed consent in Castor EDC. All data gained outside Castor EDC will be stored on the AMC secured hard drive. All data will be coded and stored in the Castor EDC online database which meets the AMC safety criteria and good clinical practice guidelines. The primary investigator and project leader will safeguard the coded data through password secured access. All participant's data will be archived for at least 15 years and handled with in accordance with the Dutch Personal Data



Protection Act (Wbp). Data protection is provided through the safety protocol of Castor EDC with automated backups and SSL security.

## 9.2 Monitoring and Quality Assurance

Throughout the trial, 5 monitoring visits will take place.

| Visit no.               | Selected Sites | Planning*                                                                                         |
|-------------------------|----------------|---------------------------------------------------------------------------------------------------|
| Initiation Visit        | All sites      | Before enrolment of the first subject, but after Ethics Committee approval has been obtained.     |
| First Monitoring Visit  | All sites      | After 3 enrolled subjects, irrespective of (e)CRF completion.                                     |
| Second Monitoring Visit | All sites      | After approximately 10 -15 enrolled subjects at site have completed the 26 weeks follow-up visit. |
| Third Monitoring Visit  | AMC            | After 70 enrolled subjects.                                                                       |
| Remote Close Out        | All sites      | After database lock                                                                               |

More details is to be found in the monitoring plan enclosed in the appendix K6.

## 9.3 Amendments

Amendments are defined as changes made to the protocol after it has been approved by the study group. Considering that this study might meet the criteria of the WMO (Medical Research Involving Human subjects Act) the METC will be notified of any amendments made if there is a question that effects the WMO criteria.

## 9.4 Publication

The results of this project study and new knowledge will be disseminated through the Dutch Arthritis Foundation (Reumafonds), presentations, news publications, blogs, websites social media and professional organisations (rheumatology, orthopaedics, primary care medicine, sports medicine, public health).

## 10. References

1. de Vos RJ, Weir A, van Schie HTM, Bierma-Zeinstra SMA, Verhaar JAN, Weinans H, et al. Platelet-rich plasma injection for chronic Achilles tendinopathy: a randomized controlled trial. *JAMA* [Internet]. 2010;303(2):144–9. Available from: <http://www.ncbi.nlm.nih.gov/pubmed/20068208>
2. Reurink G, Goudswaard GJ, Moen MH, Weir A, Verhaar JAN, Bierma-Zeinstra SMA, et al. Platelet-Rich Plasma Injections in Acute Muscle Injury. *N Engl J Med* [Internet]. 2014;370(26):2546–7. Available from: <http://www.nejm.org/doi/10.1056/NEJMc1402340>
3. Zhu Y, Yuan M, Meng HY, Wang AY, Guo QY, Wang Y, et al. Basic science and clinical application of platelet-rich plasma for cartilage defects and osteoarthritis: A review. Vol. 21, *Osteoarthritis and Cartilage*. 2013. p. 1627–37.
4. Pas HI, Reurink G, Tol JL, Weir A, Winters M, Moen MH. Efficacy of rehabilitation (lengthening) exercises, platelet-rich plasma injections, and other conservative interventions in acute hamstring injuries: an updated systematic review and meta-analysis. *Br J Sports Med* [Internet]. 2015;49(18):1197–205. Available from: <http://bjsm.bmj.com/lookup/doi/10.1136/bjsports-2015-094879>
5. Laudy ABM, Bakker EWP, Rekers M, Moen MH. Efficacy of platelet-rich plasma injections in osteoarthritis of the knee: a systematic review and meta-analysis. *Br J Sports Med* [Internet]. 2015;49(10):657–72. Available from: <http://bjsm.bmj.com/lookup/doi/10.1136/bjsports-2014-094036>
6. Moen M, Weir A, Bakker E, Rekers M, Laudy G. Efficacy of platelet-rich plasma injections in osteoarthritis of the knee: an updated systematic review and meta-analysis. *Osteoarthritis Cartilage* [Internet]. 2016;24:S520–1. Available from: <http://linkinghub.elsevier.com/retrieve/pii/S1063458416009729>
7. Fukawa T, Yamaguchi S, Akatsu Y, Yamamoto Y, Akagi R, Sasho T. Safety and Efficacy of Intra-articular Injection of Platelet-Rich Plasma in Patients With Ankle Osteoarthritis. *Foot Ankle Int* [Internet]. 2017;38(6):596–604. Available from: <http://journals.sagepub.com/doi/10.1177/1071100717700377>
8. Repetto I, Biti B, Cerruti P, Trentini R, Felli L. Conservative Treatment of Ankle Osteoarthritis: Can Platelet-Rich Plasma Effectively Postpone Surgery? *J Foot Ankle Surg*. 2017;56(2):362–5.
9. Hamilton B, Tol JL, Almusa E, Boukarroum S, Eirale C, Farooq A, et al. Platelet-rich plasma does not enhance return to play in hamstring injuries: a randomised controlled trial. *Br J Sports Med* [Internet]. 2015;49(14):943–50. Available from: <http://bjsm.bmj.com/lookup/doi/10.1136/bjsports-2015-094603>

10. van Dijk CN, Verhagen R a, Tol JL. Arthroscopy for problems after ankle fracture. *J Bone Jt Surg.* 1997;79-B(2):280-4.
11. DeGroot H, Uzunishvili S, Weir R, Al-omari A, Gomes B. Intra-articular injection of hyaluronic acid is not superior to saline solution injection for ankle arthritis: a randomized, double-blind, placebo-controlled study. *J Bone Joint Surg Am [Internet].* 2012;94(1):2-8. Available from: <http://www.ncbi.nlm.nih.gov/pubmed/22218376>
12. Cushnaghan J, Dieppe P. Study of 500 patients with limb joint osteoarthritis. I. Analysis by age, sex, and distribution of symptomatic joint sites. *Ann Rheum Dis [Internet].* 1991;50(1):8-13. Available from: <http://www.pubmedcentral.nih.gov/articlerender.fcgi?artid=1004316&tool=pmcentrez&rendertype=abstract>
13. Gouttebauge V, Inklaar H, Backx F, Kerkhoffs G. Prevalence of osteoarthritis in former elite athletes: a systematic overview of the recent literature. Vol. 35, *Rheumatology International.* 2015. p. 405-18.
14. Saltzman CL. Impact of Comorbidities on the Measurement of Health in Patients with Ankle Osteoarthritis. *J Bone Jt Surg [Internet].* 2006;88(11):2366. Available from: <http://jbjs.org/cgi/doi/10.2106/JBJS.F.00295>
15. Perrot S. Osteoarthritis pain. *Best Pract Res Clin Rheumatol [Internet].* 2015;29(1):90-7. Available from: <http://linkinghub.elsevier.com/retrieve/pii/S1521694215000248>
16. Trouvin AP, Perrot S. Pain in osteoarthritis. Implications for optimal management. *Joint Bone Spine.* 2017;
17. Angthong C, Khadsongkram A, Angthong W. Outcomes and quality of life after platelet-rich plasma therapy in patients with recalcitrant hindfoot and ankle diseases: A preliminary report of 12 patients. *J Foot Ankle Surg.* 2013;52(4):475-80.
18. Meheux CJ, McCulloch PC, Lintner DM, Varner KE, Harris JD. Efficacy of Intra-articular Platelet-Rich Plasma Injections in Knee Osteoarthritis: A Systematic Review. Vol. 32, *Arthroscopy - Journal of Arthroscopic and Related Surgery.* 2016. p. 495-505.

**Platelet Rich plasma Injection Management for Ankle osteoarthritis study (PRIMA): A multi-center,  
stratified, block-randomized, double-blind, placebo-controlled trial**  
**Version 5**

This submission is based on the formerly approved studies (same PI) evaluating the efficacy of platelet rich plasma in musculoskeletal injuries:

- Chronic achilles tendinopathy by de Vos et al. JAMA 2010 (PRICT-study, registration NTR1420, ABR NL 22805.098.08).[1]
- Acute hamstring injuries by Reurink et al. NEJM 2014 (HIT-study registration NTR2771, NL34660.098.10 / 10-163; ABR / METC Zuidwest Holland).[2]

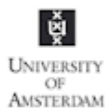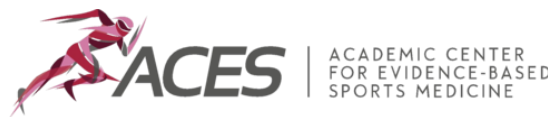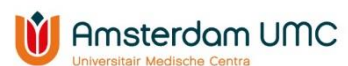

**PROTOCOL TITLE:** Platelet Rich plasma Injection Management for Ankle osteoarthritis study (PRIMA):

A multi-center, stratified, block-randomized, double-blind, placebo-controlled trial

|                                                                           |                                                                                                                                                                                                                                                                                                                                                                                                                                                               |
|---------------------------------------------------------------------------|---------------------------------------------------------------------------------------------------------------------------------------------------------------------------------------------------------------------------------------------------------------------------------------------------------------------------------------------------------------------------------------------------------------------------------------------------------------|
| <b>Protocol ID</b>                                                        | NL64160.018.18                                                                                                                                                                                                                                                                                                                                                                                                                                                |
| <b>Short title</b>                                                        | <b>PRIMA</b>                                                                                                                                                                                                                                                                                                                                                                                                                                                  |
| <b>Version</b>                                                            | <b>5</b>                                                                                                                                                                                                                                                                                                                                                                                                                                                      |
| <b>Date</b>                                                               | <b>21-04-2020</b>                                                                                                                                                                                                                                                                                                                                                                                                                                             |
| <b>Coordinating investigator/project leader</b>                           | L. D. A. Paget<br>Academic Medical Centre, Meidreef 9, 1105AZ, Amsterdam<br>T: 06 421 448 51   <a href="mailto:Ld.paget@amc.uva.nl">Ld.paget@amc.uva.nl</a>                                                                                                                                                                                                                                                                                                   |
| <b>Principal investigator(s) (in Dutch: hoofdonderzoeker/ uitvoerder)</b> | Prof. Dr. J. L. Tol<br>Academic Medical Center, Meidreef 9, 1105AZ, Amsterdam<br>Academic Center for Evidence Based Sports Medicine<br>AMC - Orthopedic surgery<br>T: 020 5662955   <a href="mailto:J.L.Tol@amc.uva.nl">J.L.Tol@amc.uva.nl</a>                                                                                                                                                                                                                |
| <b>Co-investigators</b><br>Academical Medical Center                      | Prof. dr. G Kerkhoffs<br><a href="mailto:g.m.kerkhoffs@amc.nl">g.m.kerkhoffs@amc.nl</a><br>AMC - Orthopedic surgery<br><br>Prof. dr. M. Maas<br><a href="mailto:m.maas@amc.nl">m.maas@amc.nl</a><br>AMC - Radiology<br><br>Dr. G. Reurink<br><a href="mailto:g.reurink@amc.uva.nl">g.reurink@amc.uva.nl</a><br>AMC - Orthopedic surgery<br><br>Dr S. Stufkens<br><a href="mailto:s.stufkens@amc.uva.nl">s.stufkens@amc.uva.nl</a><br>AMC - Orthopedic surgery |

|                                                         |                                                                                                                                                                                                                                                                |
|---------------------------------------------------------|----------------------------------------------------------------------------------------------------------------------------------------------------------------------------------------------------------------------------------------------------------------|
| Erasmus Medical Center                                  | <p>Prof. dr. S.M.A. Bierma – Zeinstra<br/>s.bierma-zeinstra@erasmusmc.nl<br/>EMC - Orthopedic surgery</p> <p>Dr. A. Weir<br/>a.weir@erasmusmc.nl<br/>EMC - Orthopedic surgery</p> <p>Dr. R.J. De Vos<br/>r.devos@erasmusmc.nl<br/>EMC - Orthopedic surgery</p> |
| Flevoziekenhuis                                         | <p>Dr. R. Krips<br/>r.krips@flevoziekenhuis.nl<br/>Flevoziekenhuis - Orthopedic surgery</p>                                                                                                                                                                    |
| Bergman Clinics                                         | <p>Dr. M. H.Moen<br/>m.moen@bergman.nl<br/>mh_moen@hotmail.com<br/>Sports Medicine</p>                                                                                                                                                                         |
| OLVG                                                    | <p>Dr S. Goedegebuure<br/>simongoedegebuure@desportartsengroep.nl;<br/>Sports Medicine</p>                                                                                                                                                                     |
| Spaarne Gasthuis                                        | <p>Dr. P.A. Nolte<br/><a href="mailto:pnolte@spaarnegasthuis.nl">pnolte@spaarnegasthuis.nl</a><br/>Orthopedie</p>                                                                                                                                              |
| <b>Sponsor (in Dutch:<br/>verrichter/opdrachtgever)</b> | <p>Academic Center for Evidence-based Sports Medicine<br/>Academic Medical Centre,<br/>Meibergdreef 9, 1105AZ, Amsterdam</p>                                                                                                                                   |
| <b>Subsidising party</b>                                | Reumafonds                                                                                                                                                                                                                                                     |
| <b>Independent expert (s)</b>                           |                                                                                                                                                                                                                                                                |

|                           |                |
|---------------------------|----------------|
| Academical Medical Center | P. A. Struijs  |
| Erasmus Medical Center    | K. Bos         |
| Flevoziekenhuis           | P. de Leeuw    |
| Bergman Clinics           | J. de Poorter  |
| OLVG                      | N. Wijne       |
| Spaarne Gasthuis          | W.G. Horstmann |

|    |                                                                                                |    |
|----|------------------------------------------------------------------------------------------------|----|
| 1  | <a href="#">Table of Contents</a>                                                              |    |
| 2  | This submission is based on the formerly approved studies (same PI) evaluating the efficacy of |    |
| 3  | platelet rich plasma in musculoskeletal injuries:.....                                         | 1  |
| 4  | • Chronic achilles tendinopathy by de Vos et al. JAMA 2010 (PRICT-study, registration          |    |
| 5  | NTR1420, ABR NL 22805.098.08).[1] .....                                                        | 1  |
| 6  | • Acute hamstring injuries by Reurink et al. NEJM 2014 (HIT-study registration NTR2771,        |    |
| 7  | NL34660.098.10 / 10-163; ABR / METC Zuidwest Holland).[2].....                                 | 1  |
| 8  | 1. INTRODUCTION AND RATIONAL .....                                                             | 12 |
| 9  | 1.1 Clinical relevance of ankle OA .....                                                       | 12 |
| 10 | 1.2 Pathomechanisms of OA.....                                                                 | 12 |
| 11 | 1.3 Pain pathomechanism .....                                                                  | 12 |
| 12 | 1.4 Non-surgical interventions for ankle-OA.....                                               | 12 |
| 13 | 1.5 PRP in OA – animal models .....                                                            | 13 |
| 14 | 1.6 PRP in OA – clinical studies .....                                                         | 13 |
| 15 | 1.7 Why this proposal will have a great impact .....                                           | 13 |
| 16 | 2. Study Goal .....                                                                            | 13 |
| 17 | 2.1 Hypothesis .....                                                                           | 14 |
| 18 | 3. STUDY DESIGN.....                                                                           | 14 |
| 19 | 4. STUDY POPULATION.....                                                                       | 14 |
| 20 | 4.1 Population (base).....                                                                     | 14 |
| 21 | 4.2 Inclusion criteria.....                                                                    | 14 |
| 22 | 4.3 Exclusion criteria .....                                                                   | 14 |
| 23 | 4.4 RADIOGRAPHS.....                                                                           | 15 |
| 24 | 4.5 Sample size calculation .....                                                              | 15 |
| 25 | 5. INTERVENTION.....                                                                           | 15 |
| 26 | 5.1 Intervention .....                                                                         | 15 |
| 27 | 5.2 PRP preparation .....                                                                      | 16 |
| 28 | 5.3 Use of co-intervention .....                                                               | 16 |
| 29 | 6. METHODS.....                                                                                | 17 |
| 30 | 6.1 Main study parameter/endpoint .....                                                        | 17 |
| 31 | 6.2 Secondary study parameters/endpoints.....                                                  | 17 |
| 32 | 6.3 Randomization, blinding and treatment allocation.....                                      | 17 |
| 33 | 6.4 Study procedures .....                                                                     | 18 |
| 34 | 6.5 Inclusion .....                                                                            | 18 |



|    |       |                                                               |    |
|----|-------|---------------------------------------------------------------|----|
| 35 | 6.6   | Replacement of individual subjects after withdrawal .....     | 19 |
| 36 | 6.7   | Statistical analysis.....                                     | 20 |
| 37 | 6.8   | Economic analysis.....                                        | 21 |
| 38 | 7.    | ETHICAL CONSIDERATIONS .....                                  | 21 |
| 39 | 7.1   | Informed consent .....                                        | 21 |
| 40 | 7.2   | Benefits and risk assessment, group relatedness .....         | 21 |
| 41 | 7.3   | Incentives .....                                              | 22 |
| 42 | 8.    | SAFETY REPORTING.....                                         | 22 |
| 43 | 8.1   | Temporary halt for reasons of subject safety .....            | 22 |
| 44 | 8.2   | AEs, SAEs and SUSARs.....                                     | 22 |
| 45 | 8.2.1 | Adverse events (AEs).....                                     | 22 |
| 46 | 8.2.2 | Serious adverse events (SAEs) .....                           | 23 |
| 47 | 8.2.3 | Suspected unexpected serious adverse reactions (SUSARs) ..... | 23 |
| 48 | 8.3   | Follow-up of adverse events .....                             | 24 |
| 49 | 9.    | ADMINISTRATIVE ASPECTS, MONITORING AND PUBLICATION.....       | 24 |
| 50 | 9.1   | Handling and storage of data .....                            | 24 |
| 51 | 9.2   | Monitoring and Quality Assurance.....                         | 25 |
| 52 | 9.3   | Amendments .....                                              | 25 |
| 53 | 9.4   | Publication .....                                             | 25 |
| 54 | 10.   | References .....                                              | 26 |

55

56

57 **LIST OF ABBREVIATIONS AND RELEVANT DEFINITIONS**

58

|                |                                                                                                                                                                                                                                                                                                                                                  |
|----------------|--------------------------------------------------------------------------------------------------------------------------------------------------------------------------------------------------------------------------------------------------------------------------------------------------------------------------------------------------|
| <b>ABR</b>     | <b>ABR form, General Assessment and Registration form, is the application form that is required for submission to the accredited Ethics Committee (In Dutch, ABR = Algemene Beoordeling en Registratie)</b>                                                                                                                                      |
| <b>AE</b>      | <b>Adverse Event</b>                                                                                                                                                                                                                                                                                                                             |
| <b>AR</b>      | <b>Adverse Reaction</b>                                                                                                                                                                                                                                                                                                                          |
| <b>CA</b>      | <b>Competent Authority</b>                                                                                                                                                                                                                                                                                                                       |
| <b>CCMO</b>    | <b>Central Committee on Research Involving Human Subjects; in Dutch: Centrale Commissie Mensgebonden Onderzoek</b>                                                                                                                                                                                                                               |
| <b>CV</b>      | <b>Curriculum Vitae</b>                                                                                                                                                                                                                                                                                                                          |
| <b>DSMB</b>    | <b>Data Safety Monitoring Board</b>                                                                                                                                                                                                                                                                                                              |
| <b>EU</b>      | <b>European Union</b>                                                                                                                                                                                                                                                                                                                            |
| <b>EudraCT</b> | <b>European drug regulatory affairs Clinical Trials</b>                                                                                                                                                                                                                                                                                          |
| <b>GCP</b>     | <b>Good Clinical Practice</b>                                                                                                                                                                                                                                                                                                                    |
| <b>IB</b>      | <b>Investigator's Brochure</b>                                                                                                                                                                                                                                                                                                                   |
| <b>IC</b>      | <b>Informed Consent</b>                                                                                                                                                                                                                                                                                                                          |
| <b>IMP</b>     | <b>Investigational Medicinal Product</b>                                                                                                                                                                                                                                                                                                         |
| <b>IMPD</b>    | <b>Investigational Medicinal Product Dossier</b>                                                                                                                                                                                                                                                                                                 |
| <b>METC</b>    | <b>Medical research ethics committee (MREC); in Dutch: medisch ethische toetsing commissie (METC)</b>                                                                                                                                                                                                                                            |
| <b>NSAID's</b> | <b>Non-Steroidal Anti-Inflammatory Drugs</b>                                                                                                                                                                                                                                                                                                     |
| <b>OA</b>      | <b>Osteoarthritis</b>                                                                                                                                                                                                                                                                                                                            |
| <b>OCD</b>     | <b>Osteochondral Defect</b>                                                                                                                                                                                                                                                                                                                      |
| <b>PRP</b>     | <b>Platelet-Rich Plasma</b>                                                                                                                                                                                                                                                                                                                      |
| <b>(S)AE</b>   | <b>(Serious) Adverse Event</b>                                                                                                                                                                                                                                                                                                                   |
| <b>SPC</b>     | <b>Summary of Product Characteristics (in Dutch: officiële productinformatie IB1-tekst)</b>                                                                                                                                                                                                                                                      |
| <b>Sponsor</b> | <b>The sponsor is the party that commissions the organisation or performance of the research, for example a pharmaceutical company, academic hospital, scientific organisation or investigator. A party that provides funding for a study but does not commission it is not regarded as the sponsor, but referred to as a subsidising party.</b> |
| <b>SUSAR</b>   | <b>Suspected Unexpected Serious Adverse Reaction</b>                                                                                                                                                                                                                                                                                             |
| <b>Wbp</b>     | <b>Personal Data Protection Act (in Dutch: Wet Bescherming Persoonsgegevens)</b>                                                                                                                                                                                                                                                                 |

**WMO**     **Medical Research Involving Human Subjects Act (in Dutch: Wet Medisch-wetenschappelijk Onderzoek met Mensen**

59

60

61 **SUMMARY**

62 Pain is the cardinal symptom of ankle osteoarthritis (OA) and is a complex phenomenon with limited  
63 understanding of its pathomechanisms. The main objectives in the clinical management of OA are to  
64 reduce inflammation and cartilage degeneration processes as well as relieve pain. Platelet-rich  
65 plasma (PRP) is a high concentrate of platelets derived from patient's whole blood, centrifuged to  
66 remove red blood cells. PRP has been used to encourage a healing response across several  
67 specialties, in particular dentistry, orthopaedics and dermatology. Growth factors stored in the  
68 platelets are assumed to facilitate an anti-inflammatory and analgesic effect.

69 A recent review concluded that in animal models PRP can diminish multiple inflammatory IL-1  
70 mediated effects, and can also positively influence the collagen network of the cartilage and  
71 subsequently reduce pain and improve function.[3]

72 Our recent and other systematic reviews showed that compared to placebo injections, hyaluronic  
73 acid or corticosteroid injections, PRP injections significantly decrease pain and improve function in  
74 knee OA patients.[4–6] Given the clinical effect on pain reduction in knee OA and safety, PRP might  
75 serve as a promising non-surgical therapy for ankle OA. PRP might potentially delay the irreversible  
76 surgical options like arthrodesis and joint replacement. No significant adverse events have been  
77 reported for any PRP trials regarding acute hamstring injuries, Achilles tendinopathy, knee OA and  
78 specifically not ankle OA. [1,2,4,5,7–9]. Until present, there is no RCT conducted on the efficacy of  
79 PRP in the management of ankle OA.

80

81 **Hypothesis**

82 We hypothesize that:

83 PRP injections are efficacious for symptom reduction and functional improvement compared to  
84 placebo injections in the treatment of ankle (talocrural) OA.

85

86 **Workplan**

87 **Study design**

88 A multi-center, stratified, block-randomized, double-blind, placebo-controlled trial comparing two  
89 treatment groups.

90

91

92 **Study population**

93 Patients with ankle (talocrural) OA will be included if they meet the following 3 inclusion criteria:

- 94 1. Severity of Ankle OA pain on visual analogue scale (VAS) (0–100 mm)  $\geq$  40 during daily  
95 activities  
96 2. X-rays (AP and lateral view) indicating  $\geq$  grade 2 on the Van Dijk classification [10]  
97 3. Age  $\geq$  18 years  
98

99 **Intervention**

100 Patients will be randomised into two treatment groups: PRP injection or placebo (saline) injection.

101 Both groups will receive two injections of PRP or placebo at an interval of 6 weeks.  
102

103 **Main study parameter/endpoint**

104 American Orthopaedic Foot and Ankle Society (AOFAS) score at 26 weeks follow-up, validated scale  
105 for ankle OA (0-100) measuring three subdomains (pain, function and alignment).

106 After 26 weeks, the principal investigator will be unblinded after the analysis of the primary  
107 outcome. The patients will remain blinded to the therapy until 52 weeks follow-up.  
108

109 **Power analysis**

110 Based on previous and ongoing studies, the study protocol of the randomised controlled trial is  
111 designed to detect a difference of 12 points (0-100) on the AOFAS score (minimal clinical relevant  
112 difference) between the groups.[11] Based on a previous placebo controlled RCT on injection therapy  
113 (hyaluronic acid) in ankle OA of DeGroot et al. a standard deviation of 16.3 can be expected. Taking  
114 into account a two-sided level of significance of 5%, a power of 90% and a dropout rate of 15%,  
115 approximately 50 (40 plus 15%) patients per group will be needed (N=100).[11]  
116

117 **STATISTICAL ANALYSIS**

118 To test for the effect of treatment on the between-group difference in primary outcome, we will use  
119 a repeated measurements general linear model. The effect of potential confounders (varus/valgus)  
120 will be evaluated and a correction will be performed.  
121

122 **Expected results**

123 We will provide evidence for the (potential) efficacy of PRP for symptom reduction and functional  
124 improvement in the treatment of ankle OA. A positive outcome will have an effect on the economical  
125 and disease burden. The relatively simple content and widespread availability of the PRP intervention  
126 and previously reported good safety will contribute to simple and optimal nationwide  
127 implementation.

128

129 **Conclusion**

130 Our project will provide conclusions on the efficacy of PRP in ankle OA.

131 **1. INTRODUCTION AND RATIONAL**

132 **1.1 Clinical relevance of ankle OA**

133 The reported incidence of symptomatic ankle OA is estimated at 1% to 4% in the general adult  
134 population.[12] Due to its onset at a relatively young age, the duration of ankle OA in the life of a  
135 patient is significantly longer than those with hip or knee OA and the available surgical intervention  
136 (arthrodesis) is associated with significant functional limitations. In contrast to hip and knee OA,  
137 where there is an excellent surgical alternative (joint replacement) for severe cases, there is a clear  
138 need for non-surgical successful interventions in ankle OA.

139 Health related quality of life and physical function limitations are severe and comparable with hip OA  
140 and end-stage kidney disease or congestive heart failure.[14]

141

142 **1.2 Pathomechanisms of OA**

143 Following pathological or traumatic injury of the hyaline cartilage, progressive catabolic chondrocyte  
144 activity leads to degenerative osteoarthritic joint changes. Two key characteristics of OA are the lack  
145 of regenerative activity of the chondrocytes and the inflammatory joint reaction.

146

147 **1.3 Pain pathomechanism**

148 Pain is the cardinal symptom in OA and it is a complex phenomenon of which we understand only a  
149 fraction of the pathomechanisms.[15] One of the major peripheral factors considered as being an  
150 important source of pain is joint inflammation. Previous studies showed that local inflammation, with  
151 the release of phospholipases, cyclooxygenases and leukotrienes, is involved in pain mechanisms.[15]  
152 These factors not only result in increased intra-articular pressure due to edema, but also induce the  
153 amount of nociceptors present with subsequent excitation of peripheral nerves.[15,16]

154

155 **1.4 Non-surgical interventions for ankle-OA**

156 The main objectives in the clinical management of OA are to reduce the inflammatory and cartilage  
157 degeneration processes, and to relieve pain.

158 At this time there is no evidence-based treatment algorithm for non-surgical management of ankle  
159 OA.[2,5,17,18] Several pain relief options, such as non-steroidal anti-inflammatory drugs, opioids and  
160 corticosteroid as well as hyaluronic acid injections, are available but there is a lack of evidence from  
161 high quality studies to assist in clinical decision-making.

162

163

164 **1.5 PRP in OA – animal models**

165 Platelet Rich Plasma (PRP) is defined as plasma containing a concentration of at least 1,000,000  
166 platelets/ $\mu$ l. Growth factors (GF) are stored in  $\alpha$ -granules within platelets, and are released in a  
167 selective manner upon activation. GF released from the  $\alpha$ -granules of platelets are assumed to  
168 provide the regenerative and anti-inflammatory benefits of PRP.

169  
170 Recent reviews concluded that in animal models, PRP can diminish multiple inflammatory IL-1  
171 mediated effects.[3] Due to this local anti-inflammatory response, PRP might have an indirect  
172 analgesic effect. The second suggested effect might be an increased mRNA expression of  
173 proteoglycan core protein in the articular cartilage and decreased chondrocyte apoptosis.[3]  
174 Consequently, PRP could also positively influence the collagen network of the cartilage.

175

176 **1.6 PRP in OA – clinical studies**

177 Several systematic reviews have shown that compared to placebo injections, hyaluronic acid or  
178 corticosteroid injections, PRP injections significantly decrease pain, improve function and are simple  
179 and safe.[5,18] In the majority of studies, the patients received 2-3 injections at fixed intervals. Given  
180 its clinical effect on pain reduction in OA and safety, PRP therapy in ankle OA might serve as a distinct  
181 non-surgical therapy for reducing pain and improving function. Clinical studies on the use of PRP in  
182 ankle OA are limited to a single report of 5 cases, which showed significant reduction of the VAS-FA  
183 score at a mean of 16 months follow-up.[17] Our preliminary results on the outcome of PRP injection  
184 in 14 patients with van Dijk Grade 2 ankle OA, revealed that 64% reported improvement of their  
185 symptoms. A lack of validated outcome scores, low quality study designs and small sample sizes are  
186 the main limitations of these previously conducted studies.

187

188 **1.7 Why this proposal will have a great impact**

189

190 The strength and uniqueness of our project is that: We will evaluate the promising findings from  
191 animal studies and positive clinical observations of PRP in ankle OA patients in a Level 1 study.

192

193

194 **2. Study Goal**

195 The goal of this study is to determine the efficacy of PRP injections in the management of ankle  
196 osteoarthritis by comparing 2 groups, both receiving 2 injections of either: PRP or a placebo saline  
197 solution.



198 **2.1 Hypothesis**

199 We hypothesize that: PRP injections are efficacious for symptom reduction and functional  
200 improvement compared to placebo injections in the treatment of ankle (talocrural) OA

201

202 **3. STUDY DESIGN**

203 A multi-center, stratified, block-randomized, double-blind, placebo-controlled trial comparing two  
204 treatment groups.

205

206 **4. STUDY POPULATION**

207 **4.1 Population (base)**

208 Patients with ankle OA in two University Medical Centres (Erasmus MC, AMC), two teaching  
209 hospitals (OLVG, Spaarne Gashtuis, ageneral hospital (Flevo Hospital) and focus clinic (Bergman  
210 Clinic) will be informed about the study.

211

212 **4.2 Inclusion criteria**

- 213 1. Severity of Ankle OA pain on a visual analogue scale (VAS) (0–100 mm)  $\geq$  40 during daily  
214 activities  
215 2. X-rays (AP and lateral view) indicating  $\geq$  grade 2 on the Van Dijk classification[10]  
216 3. Age  $\geq$  18 years  
217

218 **4.3 Exclusion criteria**

- 219 1. Patient has received injection therapy for ankle OA in the previous 6 months  
220 2. Patient does not want to receive one of the two therapies  
221 3. Patient has clinical signs of concomitant OA of one or more other major joints of the lower  
222 extremities that negatively affects their daily activity level  
223 4. Previous ankle surgery for OA or Osteochondral defects (OCD)  $<$  1 year (not including surgery  
224 for an ankle fracture in the past)  
225

226

#### 227 **4.4 RADIOGRAPHS**

228 AP and lateral X-rays of the ankles will be scored according to the Van Dijk classification:[10]

- 229 • 0 Normal joint or subchondral sclerosis
  - 230 • I Osteophytes without joint space narrowing
  - 231 • II Joint space narrowing with or without osteophytes
  - 232 • III (Sub)total disappearance or deformation of the joint space
- 233

#### 234 **4.5 Sample size calculation**

235 Based on previous and ongoing studies, the study protocol of the randomised controlled trial is  
236 designed to detect a difference of 12 points (0-100) on the AOFAS score (minimal clinical relevant  
237 difference) between the groups.[11] Based on a previous placebo controlled RCT on injection therapy  
238 (hyaluronic acid) in ankle OA of DeGroot et al. a standard deviation of 16.3 can be expected. Taking  
239 into account a two-sided level of significance of 5%, a power of 90% and a dropout rate of 15%,  
240 approximately 50 (40 plus 15%) patients per group will be needed (N=100).[11]

241

242

### 243 **5. INTERVENTION**

#### 244 **5.1 Intervention**

245 In this study, patients will be randomised into two treatment groups: PRP injection or placebo saline  
246 injection. Treatment allocation will be concealed. One syringe of 15ml autologous blood will be  
247 collected twice from the cubital vein by the coordinating researcher or a trained research assistant or  
248 a BIG registered person with significant experience with the procedure: at inclusion and at a time  
249 interval of approximately 6 weeks. All participants will receive a second injection, regardless of the  
250 effect of the first injection. This blood will be prepared according to the instructions of the  
251 manufacturer (see appendix F4 Protocol bloedafname - PRP bereiden - intra-articulair injectie enkel),  
252 and the injection will be given within 30 minutes following venipuncture. For each injection 2 ml will  
253 be injected into the affected ankle joint under ultrasonographic guidance. The control group will  
254 follow the exact same protocol of venipuncture and preparation of the PRP, but instead of PRP, 2ml  
255 physiological saline will be injected on both occasions. To guarantee blinding for the allocated  
256 treatment of the patient, treatment assessor and treating physician, blood will be drawn and PRP will  
257 be prepared for each patient during both injections (at inclusion and at a time interval of 6 weeks  
258 after the first injection). An unblinded research assistant will prepare an injection with either PRP or  
259 physiological saline. The injection will be blinded by a specially manufactured covering sheath in  
260 order to conceal randomisation. Following the intra-articular injection, the sheath (containing either  
261 the remnants of the PRP or saline), will be directly handed to the unblinded research assistant, who

262 will immediately dispose of the syringe, therefore keeping the physician and coordinating researcher  
263 blinded.

264

## 265 **5.2 PRP preparation**

266 This blood will be prepared according to the instructions of the manufacturer (see appendix F4  
267 Protocol bloedafname - PRP bereiden - intra-articulair injectie enkel). The same method was used in  
268 a RCT on acute hamstring injuries by Reurink et al, 2014 NEJM.[2] For each patient the coordinating  
269 researcher a trained research assistant or a BIG registered person with significant experience with  
270 the procedure, will prepare a PRP and a placebo injection (isotonic saline: 0.9% sodium chloride).  
271 Prior to commencement of the study, the coordinating researcher was trained by a representative of  
272 Arthrex, as well as two experienced members of the PRIMA trial research group (dr. G Reurink en dr.  
273 RJ de Vos ) with a vast experience regarding PRP preparation and injection. Prior to delegating the  
274 PRP and placebo injection syringe preparation procedure to a research assistant, the research  
275 assistant will be trained by a representative of Arthrex or a BIG registered person with significant  
276 experience with the procedure for the PRP injection syringe preparation. These tasks will be  
277 delegated only after approval by the local PI and registration in the delegation log.

278 For the placebo injection syringe preparation procedure, the research assistant or a BIG registered  
279 person with significant experience with the procedure will be trained by the coordinating researcher  
280 through a video manual or videoconsult.

281 The PRP will be prepared using a widely used and commercial available system (Arthrex double  
282 syringe PRP system, Arthrex Medizinische Instrumente GmbH, Garching, Germany). Quality of the  
283 system meets internationally accepted standards according to the international organization for  
284 standardization standard (ISO13485 medical devices). Further CE certificates are in the appendix  
285 (D2). One syringe of approximately 15ml of venous blood will be collected from the cubital vein by  
286 the coordinating researcher or a research assistant. After blood collection the syringe will undergo 5  
287 minutes of centrifugation. Further reference regarding injection instructions and sterility procedure  
288 to be found in appendix F4 Protocol bloedafname - PRP bereiden - intra-articulair injectie enkel.

289

## 290 **5.3 Use of co-intervention**

291 Patients are instructed to avoid the use of co-interventions and NSAID's 24 hours prior to the  
292 intervention and during the follow-up period. Throughout the study, any co-interventions (including  
293 usual care: exercise therapy and healthy life style advice) used by participants will be registered, such  
294 as NSAID's, other analgesic drugs, intra-articular injections or inlays.

295

296 **6. METHODS**

297 **6.1 Main study parameter/endpoint**

298 1. American Orthopaedic Foot and Ankle Society (AOFAS) score at 26 weeks follow-up, validated  
299 scale for ankle OA (0-100) measuring three subdomains (pain, function and alignment).

300

301 **6.2 Secondary study parameters/endpoints**

302 Main secondary outcome:

- 303 1. Pain scores: (VAS 0-100) during activities of daily living and the pain sub-scale of AOFAS (0-  
304 40)
- 305 2. Ankle activity score (0-10)
- 306 3. Subjective patient satisfaction (4 categories)
- 307 4. Health related quality of life (SF-36 scale)
- 308 5. The Global Attainment Scaling (GAS)
- 309 6. EQ-5D-3L utility score
- 310 7. Ankle Osteoarthritis Score (AOS)
- 311 8. Foot and Ankle Outcome Score (FAOS)
- 312

313 **6.3 Randomization, blinding and treatment allocation**

314 In line with our previously conducted multicenter RCT, patients will be included at the centre of their  
315 first outpatient clinic appointment.[2] For each patient the coordinating researcher or research  
316 assistant or a BIG registered person with significant experience with the procedure prepared a  
317 syringe with PRP and a syringe with placebo (isotonic saline: 0.9% sodium chloride). CASTORedc will  
318 be used to perform a computer generated block randomisation scheme with patients stratified to  
319 center with a variable block size of two, four or six. The coordinating researcher remains blinded to  
320 the allocated intervention. An unblinded research assistant will have access to the randomization  
321 result and the allocated intervention. The unblinded research assistant then selects one of the two  
322 syringes based on the allocated intervention and blinds the syringe with a covering sheath. The  
323 patients, physicians, and coordinating researcher (or research assistant or a BIG registered person  
324 with significant experience with the procedure) will all be blinded to the allocation of the  
325 intervention and to the contents of the syringe. The success of blinding will be assessed by asking  
326 participants which injection they think they have received, this will then be registered accordingly. In  
327 the event of questions or problems that cannot be answered or solved by the treating physician or  
328 coordinating researcher, patients may contact the independent physician.

329

330 After the 26 weeks follow-up of the last patient in the study, the principal investigator and  
331 coordinating researcher will be unblinded only after the analysis of the primary outcome. The  
332 patients will remain blinded to the therapy until the 52 weeks follow-up (online questionnaire) of the

333 last patient in the study. At 52 weeks follow-up, a second blinded researcher will evaluate the  
334 patients using the outcome measurements.

335

#### 336 **6.4 Study procedures**

337 Following x-ray imaging performed under usual patient care, in the event the patient meets the  
338 criteria for inclusion and exclusion, he or she will be informed in more detail about the study  
339 procedure. At that time the patient can ask questions about the study and decide whether they will  
340 participate. The patient has no maximum time limit to consider participation and may proceed to  
341 sign the informed consent form. Subsequently the patient will proceed to inclusion and the  
342 randomization procedure.

343

#### 344 **6.5 Inclusion**

345 Patients are recruited for inclusion by their treating physicians at location. An AP and lateral view X-  
346 ray will be performed at baseline prior to inclusion to the PRIMA trial. Following inclusion PRP will be  
347 prepared according to the PRP system instructions of the manufacturer (see supplement 1). During  
348 the first two consultations a total of two intra-articular injections will be documented. The patient  
349 will have no additional costs as a result of taking part in this study.

350

351 Follow-up will be at 6, 12, 26, 39, 52 weeks and 5 years (Questionnaires will be managed and  
352 distributed digitally using a GCP approved data management system (Castor EDC). The time points  
353 and outcome measurements are described below:

354 6 weeks:

- 355 – Standard follow-up questionnaires, physical examination (see appendix F1 & F4)
- 356 – Second PRP or normal saline placebo injection

357 12 weeks:

- 358 – *Standard follow-up questionnaires and PRODISQ questionnaire* (see appendix F1 & F4)

359 26 weeks:

- 360 – *Standard follow-up questionnaires, PRODISQ questionnaire and physical examination* (see appendix  
361 *F1 & F4). Since trial patients may not be able to come to the investigational site for protocol-specified*  
362 *visits (due to local regulations) due to the COVID-19 pandemic, video consultations will be*  
363 *implemented when necessary and feasible, and will be sufficient to assure the safety of trial patients.”*

364 39 weeks:

- 365 – *PRODISQ questionnaire* (see appendix F1)

366 52 weeks:

367 – Standard follow-up questionnaires, PRODISQ questionnaire (see appendix F1 & F4)

368

## 369 **6.6 Replacement of individual subjects after withdrawal**

370 In the sample size calculation we compensated for an expected loss of 10% of patients to follow-up.

371 No patients will be replaced after withdrawal.

372 *Post randomisation replacement during the Covid-19 related regulations:*

373 *To prevent potential immediate hazard to the patients and in compliance with the institutional and*  
374 *national Covid-19 -related clinical research regulations, we deviated from the protocol and replaced*  
375 *patients following Institutional Review Board (IRB) (in Dutch: Medisch Ethische Toetsingscommissie)*  
376 *approval (submission date 14-4-2020).(1,2)*

377

378 *During the COVID-19 pandemic, 12 received their first intervention (intra-articular injection), but*  
379 *these patients had no access to receiving their second injection at the pre-defined 6 week time-*  
380 *interval. Following consultation with the head of the department and/or local principal investigators,*  
381 *considering the risks and descaling of elective patient bound activities, we found the COVID-19*  
382 *associated potential risks to outweigh the potential damage due to the disease for which they had no*  
383 *access to the intervention.*

384

385 *As in-person visits are required for administration of the investigational products (intra-articular*  
386 *injections), protection of a participant's safety, welfare, and rights is best served by discontinuing the*  
387 *administration or use of the investigational product and subsequent participation in the trial.(1,2) In*  
388 *order to minimise protocol deviations, maintain the previously calculated sample size of 100 patients,*  
389 *we asked IRB approval for replacing them with 12 new inclusions. Following IRB approval we will start*  
390 *including patients as soon as (1) out-patient non-COVID-19 care is scaled up, (2) there is approval*  
391 *from the local head of the department and/or local principal investigator and (3) the local regulations*  
392 *permitted. By doing this, we accounted for the potential risks for patients and documented this*  
393 *accordingly in an emergency risk management plan.*

394 *At the start of the trial we did not anticipate that a substantial number of patients who were*  
395 *randomised into the trial would subsequently be unable to undergo the intervention (due to the*  
396 *Covid-19 crisis).*

397 *By asking the IRB approval for replacing these patients that had no access to the intervention, due to*  
398 *COVID-19 regulations, we minimize potential bias, as:*

- Allocation to the treatment or control arm will not have influenced the discontinuation of trial participation (internal validity).
- We will follow the similar recruitment procedure of consecutive patients after the COVID-19 ban has been stopped and therefore the newly included patients are expected to be representative for the same population as the patients for whom the trial participation has been discontinued (external validity).

405

406 Participation of these 12 patients will be discontinued and they will be informed by written letter, e-  
407 mail and/or telephone call. The monitoring body will be informed within 48 hours following IRB  
408 approval.

409 The Sponsor and clinical investigators will document how restrictions related to COVID-19 led to the  
410 changes in study conduct and duration of those changes and indicate which and how trial patients  
411 will be impacted. We will capture specific information in the case report form that explains the basis  
412 of potential missing data, including the relationship to COVID-19 for missing protocol-specified  
413 information (e.g., from missed study visits or study discontinuations due to COVID-19). This  
414 information, will be summarized in the clinical study report.

415 The proposed IRB amendment (submitted on 14-4-2020) with changes in the protocol will be updated  
416 in the data management and/or statistical analysis plan amendments. Prior to locking the database,  
417 we will address in the statistical analysis plan how protocol deviations related to COVID-19 will be  
418 handled for the pre-specified analyses.

419

420 In these extreme circumstances, we are confronted with a crisis and are forced to think of solutions in  
421 order to maintain the quality of the study. The European Committee for Human Medicinal Products,  
422 recommend collection of as much data as possible. In the current situation we find the trial load for  
423 patients no longer participating too heavy and thus unethical. Consequently, we will limit data  
424 collection in these patients to the primary outcome measure, AOFAS at 26 weeks (1x 10 min by  
425 videoconsult).

426

## 427 **6.7 Statistical analysis**

428 The statistical analysis of the primary outcome measure will be blinded using only the blinded codes  
429 of the randomisation groups. To test for the effect of treatment on the between-group difference in  
430 primary outcome, we will use the repeated measurement general linear model. Changes from  
431 baseline to all follow-up time points will be included in the model. Adjustments will be made for  
432 those variables that influenced the primary outcome with  $P < 0.10$ . However, both adjusted and

433 unadjusted results will be presented. Logistic and linear regression analyses will be used for  
434 respectively binary and numerical secondary outcome parameters. Our analysis will include  
435 imputation for missed data and sensitivity analysis.

436

## 437 **6.8 Economic analysis**

438 In the event of a positive significant outcome, an economic analysis is needed to support a possible  
439 change of practice. An economic analysis (costs) will be performed in order to determine cost-  
440 effectiveness. Consequently, the amount of symptom reduction may be related to cost-effectivity of  
441 PRP injection treatment. The analysis will be based on indirect costs and direct costs and will be  
442 determined using the PRODISQ questionnaire. The PRODISQ questionnaire is taken at baseline and  
443 every 3 months thereafter up until 1 year. The cost-effectivity analysis occurs at 1 year. The PRODISQ  
444 questionnaire is submitted in the Appendix (F1).

445

## 446 **7. ETHICAL CONSIDERATIONS**

447

448 This study will be conducted in accordance with the Declaration of Helsinki and the Personal Data  
449 Protection Act (Wbp). The AMC medical ethical committee will judge whether the study meets the  
450 criteria for the Medical Research involving Human subjects act (WMO).

451

### 452 **7.1 Informed consent**

453 When patients wish to participate in the trial, he or she will be asked to fill in a written informed  
454 consent form.

455

### 456 **7.2 Benefits and risk assessment, group relatedness**

457 When compared to OA of the knee and hip, ankle OA is more common in the relatively young and  
458 active population, with the highest incidence in females. Health related quality of life and physical  
459 functioning is comparable with hip OA and end-stage kidney disease or congestive heart failure.[14]

460 This relatively young (female) ankle OA population is at increased risk for decreased work  
461 participation and family care. In the absence of evidence-based non-surgical interventions, a positive  
462 outcome will have an impact on the economical (if cost-effective) and disease burden of this  
463 prevalent disease. The relatively simple content and widespread availability of the intervention and  
464 previously reported good safety will contribute to simple and optimal nationwide implementation.

465 Complications have not been observed in previous studies with PRP injections having been  
466 performed on different muscle and tendon injuries as well as intra-articular injections of the knee



467 and ankle. Although no adverse effects have been previously reported, no guarantee can be given.  
468 Experiences from experts in clinical practise using intra-articular PRP injections indicate that  
469 approximately 10% of participants experience some mild joint pain up to 3 weeks following the PRP  
470 injection. On inclusion, participants will undergo ankle x-rays as would normally have been the case  
471 had they not participated in the study.  
472 A negative outcome (no effect of PRP) will prevent the widespread use of a non-efficacious  
473 treatment on patients. Our previous PRP RCTs have shown that initially one high quality study will  
474 have an enormous impact on clinical application and negates the need for starting low quality studies  
475 (as it evolved in knee OA PRP studies).

### 477 **7.3 Incentives**

478 In the event of additional visits related to the study, travel compensation will be granted.

479

## 480 **8. SAFETY REPORTING**

### 481 **8.1 Temporary halt for reasons of subject safety**

482 In accordance to section 10, subsection 1, of the WMO  
483 ([http://www.ccmo.nl/attachments/files/wmo-engelse-vertaling-29-7-2013-afkomstig-van-](http://www.ccmo.nl/attachments/files/wmo-engelse-vertaling-29-7-2013-afkomstig-van-vws.pdf)  
484 [vws.pdf](http://www.ccmo.nl/attachments/files/wmo-engelse-vertaling-29-7-2013-afkomstig-van-vws.pdf)), the sponsor (AMC) will suspend the study if there is sufficient ground that continuation  
485 of the study will jeopardise subject health or safety. The sponsor will notify the accredited METC  
486 without undue delay of a temporary halt including the reason for such an action. The study will  
487 be suspended pending a further positive decision by the accredited METC. The investigator will  
488 take care that all subjects are kept informed.

489

### 490 **8.2 AEs, SAEs and SUSARs**

#### 491 **8.2.1 Adverse events (AEs)**

492 Adverse events are defined as any undesirable experience occurring to a subject  
493 during the study, whether or not considered related to the intervention. All adverse events  
494 reported spontaneously by the subject or observed by the investigator or his staff will be  
495 recorded.

496

497 **8.2.2 Serious adverse events (SAEs)**

498 A serious adverse event is any untoward medical occurrence or effect that

- 499 - results in death;
- 500 - is life threatening (at the time of the event);
- 501 - requires hospitalisation or prolongation of existing inpatients' hospitalisation;
- 502 - results in persistent or significant disability or incapacity;
- 503 - is a congenital anomaly or birth defect; or
- 504 - any other important medical event that did not result in any of the outcomes listed
- 505 above due to medical or surgical intervention but could have been based upon
- 506 appropriate judgement by the investigator.

507 An elective hospital admission will not be considered as a serious adverse event.

508

509 The investigator will report all SAEs to the sponsor without undue delay after obtaining

510 knowledge of the events.

511

512 The sponsor will report the SAEs through the web portal *ToetsingOnline* to the accredited

513 METC that approved the protocol, within 7 days of first knowledge for SAEs that result in

514 death or are life threatening followed by a period of maximum of 8 days to complete the

515 initial preliminary report. All other SAEs will be reported within a period of maximum 15 days

516 after the sponsor has first knowledge of the serious adverse events.

517

518 **8.2.3 Suspected unexpected serious adverse reactions (SUSARs)**

519 Adverse reactions are all untoward and unintended responses to an investigational product

520 related to any dose administered.

521

522 Unexpected adverse reactions are SUSARs if the following three conditions are met:

- 523 1. the event must be serious (see chapter 9.2.2);
- 524 2. there must be a certain degree of probability that the event is a harmful and an
- 525 undesirable reaction to the medicinal product under investigation, regardless of the
- 526 administered dose;
- 527 3. the adverse reaction must be unexpected, that is to say, the nature and severity of the
- 528 adverse reaction are not in agreement with the product information as recorded in:
- 529 - Summary of Product Characteristics (SPC) for an authorised medicinal product;
- 530 - Investigator's Brochure for an unauthorised medicinal product.

531

532 The sponsor will report expedited the following SUSARs through the web portal

533 *ToetsingOnline* to the METC.

534 – SUSARs that have arisen in the clinical trial that was assessed by the METC;

535 – SUSARs that have arisen in other clinical trials of the same sponsor and with the same  
536 medicinal product, and that could have consequences for the safety of the subjects  
537 involved in the clinical trial that was assessed by the METC.

538 The remaining SUSARs are recorded in an overview list (line-listing) that will be submitted  
539 once every half year to the METC. This line-listing provides an overview of all SUSARs from  
540 the study medicine, accompanied by a brief report highlighting the main points of concern.

541 The expedited reporting of SUSARs through the web portal Eudravigilance or  
542 *ToetsingOnline* is sufficient as notification to the competent authority.

543

544 The sponsor will report expedited all SUSARs to the competent authorities in other  
545 Member States, according to the requirements of the Member States.

546

547 The expedited reporting will occur not later than 15 days after the sponsor has first  
548 knowledge of the adverse reactions. For fatal or life threatening cases the term will be  
549 maximal 7 days for a preliminary report with another 8 days for completion of the report.

### 550 **8.3 Follow-up of adverse events**

551 All AEs will be followed until they have abated, or until a stable situation has been reached.

552 Depending on the event, follow up may require additional tests or medical procedures as  
553 indicated, and/or referral to the general physician or a medical specialist.

554 SAEs need to be reported till end of study within the Netherlands, as defined in the protocol

555

## 556 **9. ADMINISTRATIVE ASPECTS, MONITORING AND PUBLICATION**

### 557 **9.1 Handling and storage of data**

558 After giving permission for participating in this study, participants will receive a link to fill in surveys  
559 and their informed consent in Castor EDC. All data gained outside Castor EDC will be stored on the  
560 AMC secured hard drive. All data will be coded and stored in the Castor EDC online database which  
561 meets the AMC safety criteria and good clinical practice guidelines. The primary investigator and  
562 project leader will safeguard the coded data through password secured access. All participant's data  
563 will be archived for at least 15 years and handled with in accordance with the Dutch Personal Data

564 Protection Act (Wbp). Data protections is provided through the safety protocol of Castor EDC with  
565 automated backups and SSL security.

566

## 567 **9.2 Monitoring and Quality Assurance**

568 Throughout the trial, 5 monitoring visits will take place.

| Visit no.               | Selected Sites | Planning*                                                                                         |
|-------------------------|----------------|---------------------------------------------------------------------------------------------------|
| Initiation Visit        | All sites      | Before enrolment of the first subject, but after Ethics Committee approval has been obtained.     |
| First Monitoring Visit  | All sites      | After 3 enrolled subjects, irrespective of (e)CRF completion.                                     |
| Second Monitoring Visit | All sites      | After approximately 10 -15 enrolled subjects at site have completed the 26 weeks follow-up visit. |
| Third Monitoring Visit  | AMC            | After 70 enrolled subjects.                                                                       |
| Remote Close Out        | All sites      | After database lock                                                                               |

569

570 More details is to be found in the monitoring plan enclosed in the appendix K6.

571

## 572 **9.3 Amendments**

573 Amendments are defined as changes made to the protocol after it has been approved by the study  
574 group. Considering that this study might meet the criteria of the WMO (Medical Research Involving  
575 Human subjects Act) the METC will be notified of any amendments made if there is a question that  
576 effects the WMO criteria.

577

## 578 **9.4 Publication**

579 The results of this project study and new knowledge will be disseminated through the Dutch Arthritis  
580 Foundation (Reumafonds), presentations, news publications, blogs, websites social media and  
581 professional organisations (rheumatology, orthopaedics, primary care medicine, sports medicine,  
582 public health).

583

584

585 **10. References**

- 586 1. de Vos RJ, Weir A, van Schie HTM, Bierma-Zeinstra SMA, Verhaar JAN, Weinans H, et al.  
587 Platelet-rich plasma injection for chronic Achilles tendinopathy: a randomized controlled trial.  
588 JAMA [Internet]. 2010;303(2):144–9. Available from:  
589 <http://www.ncbi.nlm.nih.gov/pubmed/20068208>
- 590 2. Reurink G, Goudswaard GJ, Moen MH, Weir A, Verhaar JAN, Bierma-Zeinstra SMA, et al.  
591 Platelet-Rich Plasma Injections in Acute Muscle Injury. N Engl J Med [Internet].  
592 2014;370(26):2546–7. Available from: <http://www.nejm.org/doi/10.1056/NEJMc1402340>
- 593 3. Zhu Y, Yuan M, Meng HY, Wang AY, Guo QY, Wang Y, et al. Basic science and clinical  
594 application of platelet-rich plasma for cartilage defects and osteoarthritis: A review. Vol. 21,  
595 Osteoarthritis and Cartilage. 2013. p. 1627–37.
- 596 4. Pas HI, Reurink G, Tol JL, Weir A, Winters M, Moen MH. Efficacy of rehabilitation (lengthening)  
597 exercises, platelet-rich plasma injections, and other conservative interventions in acute  
598 hamstring injuries: an updated systematic review and meta-analysis. Br J Sports Med  
599 [Internet]. 2015;49(18):1197–205. Available from:  
600 <http://bjsm.bmj.com/lookup/doi/10.1136/bjsports-2015-094879>
- 601 5. Laudy ABM, Bakker EWP, Rekers M, Moen MH. Efficacy of platelet-rich plasma injections in  
602 osteoarthritis of the knee: a systematic review and meta-analysis. Br J Sports Med [Internet].  
603 2015;49(10):657–72. Available from: [http://bjsm.bmj.com/lookup/doi/10.1136/bjsports-](http://bjsm.bmj.com/lookup/doi/10.1136/bjsports-2014-094036)  
604 [2014-094036](http://bjsm.bmj.com/lookup/doi/10.1136/bjsports-2014-094036)
- 605 6. Moen M, Weir A, Bakker E, Rekers M, Laudy G. Efficacy of platelet-rich plasma injections in  
606 osteoarthritis of the knee: an updated systematic review and meta-analysis. Osteoarthritis Cartil  
607 [Internet]. 2016;24:S520–1. Available from:  
608 <http://linkinghub.elsevier.com/retrieve/pii/S1063458416009729>
- 609 7. Fukawa T, Yamaguchi S, Akatsu Y, Yamamoto Y, Akagi R, Sasho T. Safety and Efficacy of Intra-  
610 articular Injection of Platelet-Rich Plasma in Patients With Ankle Osteoarthritis. Foot Ankle Int  
611 [Internet]. 2017;38(6):596–604. Available from:  
612 <http://journals.sagepub.com/doi/10.1177/1071100717700377>
- 613 8. Repetto I, Biti B, Cerruti P, Trentini R, Felli L. Conservative Treatment of Ankle Osteoarthritis:  
614 Can Platelet-Rich Plasma Effectively Postpone Surgery? J Foot Ankle Surg. 2017;56(2):362–5.
- 615 9. Hamilton B, Tol JL, Almusa E, Boukarroum S, Eirale C, Farooq A, et al. Platelet-rich plasma does  
616 not enhance return to play in hamstring injuries: a randomised controlled trial. Br J Sports  
617 Med [Internet]. 2015;49(14):943–50. Available from:  
618 <http://bjsm.bmj.com/lookup/doi/10.1136/bjsports-2015-094603>

- 619 10. van Dijk CN, Verhagen R a, Tol JL. Arthroscopy for problems after ankle fracture. *J Bone Jt*  
620 *Surg.* 1997;79-B(2):280–4.
- 621 11. DeGroot H, Uzunishvili S, Weir R, Al-omari A, Gomes B. Intra-articular injection of hyaluronic  
622 acid is not superior to saline solution injection for ankle arthritis: a randomized, double-blind,  
623 placebo-controlled study. *J Bone Joint Surg Am [Internet]*. 2012;94(1):2–8. Available from:  
624 <http://www.ncbi.nlm.nih.gov/pubmed/22218376>
- 625 12. Cushnaghan J, Dieppe P. Study of 500 patients with limb joint osteoarthritis. I. Analysis by age,  
626 sex, and distribution of symptomatic joint sites. *Ann Rheum Dis [Internet]*. 1991;50(1):8–13.  
627 Available from:  
628 [http://www.pubmedcentral.nih.gov/articlerender.fcgi?artid=1004316&tool=pmcentrez&rend](http://www.pubmedcentral.nih.gov/articlerender.fcgi?artid=1004316&tool=pmcentrez&rendertype=abstract)  
629 [ertype=abstract](http://www.pubmedcentral.nih.gov/articlerender.fcgi?artid=1004316&tool=pmcentrez&rendertype=abstract)
- 630 13. Gouttebauge V, Inklaar H, Backx F, Kerkhoffs G. Prevalence of osteoarthritis in former elite  
631 athletes: a systematic overview of the recent literature. Vol. 35, *Rheumatology International*.  
632 2015. p. 405–18.
- 633 14. Saltzman CL. Impact of Comorbidities on the Measurement of Health in Patients with Ankle  
634 Osteoarthritis. *J Bone Jt Surg [Internet]*. 2006;88(11):2366. Available from:  
635 <http://jbjs.org/cgi/doi/10.2106/JBJS.F.00295>
- 636 15. Perrot S. Osteoarthritis pain. *Best Pract Res Clin Rheumatol [Internet]*. 2015;29(1):90–7.  
637 Available from: <http://linkinghub.elsevier.com/retrieve/pii/S1521694215000248>
- 638 16. Trouvin AP, Perrot S. Pain in osteoarthritis. Implications for optimal management. *Joint Bone*  
639 *Spine.* 2017;
- 640 17. Angthong C, Khadsongkram A, Angthong W. Outcomes and quality of life after platelet-rich  
641 plasma therapy in patients with recalcitrant hindfoot and ankle diseases: A preliminary report  
642 of 12 patients. *J Foot Ankle Surg.* 2013;52(4):475–80.
- 643 18. Meheux CJ, McCulloch PC, Lintner DM, Varner KE, Harris JD. Efficacy of Intra-articular Platelet-  
644 Rich Plasma Injections in Knee Osteoarthritis: A Systematic Review. Vol. 32, *Arthroscopy -*  
645 *Journal of Arthroscopic and Related Surgery.* 2016. p. 495–505.
- 646 19. Le Roux CW, Astrup AV, Fujioka K, Greenway F, Lau DCW, Van Gaal L, et al. 3 years of  
647 liraglutide versus placebo for type 2 diabetes risk reduction and weight management in  
648 individuals with prediabetes: a randomised, double-blind trial. *Lancet.* 2017;  
649

## Summary of Changes Protocol

| Protocol version                                      | Approval Medical Ethics Review Committee Amsterdam Medical Center, the Netherlands (ABR 2018-042) | Description of and reason for changes<br>(Highlighted in yellow in version 5)                                                                                                                                                                                                                                                                                                                                     |
|-------------------------------------------------------|---------------------------------------------------------------------------------------------------|-------------------------------------------------------------------------------------------------------------------------------------------------------------------------------------------------------------------------------------------------------------------------------------------------------------------------------------------------------------------------------------------------------------------|
| 4.0                                                   | 23-07-2018                                                                                        |                                                                                                                                                                                                                                                                                                                                                                                                                   |
| <b>First patient included in the trial 24-08-2018</b> |                                                                                                   |                                                                                                                                                                                                                                                                                                                                                                                                                   |
| 5.0                                                   | 21-04-2020                                                                                        | <ul style="list-style-type: none"> <li>- Amendment due to COVID-19 pandemic: During the COVID-19 pandemic, 12 patients received their first intervention (intra-articular injection), but these patients had no access to receiving their second injection at the pre-defined 6 week time interval. Participation of these 12 patients was discontinued and they were replaced with 12 new inclusions.</li> </ul> |

# Statistical Analysis Plan

|                                                                                                                                                                                                        |                                    |                                                                              |                                                                                       |                   |
|--------------------------------------------------------------------------------------------------------------------------------------------------------------------------------------------------------|------------------------------------|------------------------------------------------------------------------------|---------------------------------------------------------------------------------------|-------------------|
| <p>Platelet-Rich plasma Injection Management for Ankle osteoarthritis study<br/>(PRIMA): protocol of a Dutch multicentre, stratified, block-randomised,<br/>double-blind, placebo-controlled trial</p> |                                    |                                                                              |                                                                                       |                   |
| Dutch Trial Register                                                                                                                                                                                   | NTR7261 (registered<br>2018-06-06) | METC ABR                                                                     | 2018-042                                                                              |                   |
| SAP Version                                                                                                                                                                                            | 1                                  | SAP Version Date                                                             | 10-2-2020                                                                             |                   |
|                                                                                                                                                                                                        |                                    |                                                                              |                                                                                       |                   |
| Role of Contributor                                                                                                                                                                                    | Name                               | Affiliation                                                                  | Signature                                                                             | Date of Signature |
| Principal Investigator                                                                                                                                                                                 | Prof. J.L. Tol                     | Orthopaedic<br>Surgery<br>Amsterdam UMC                                      |  | 10 Feb 2020       |
| Researcher who will perform the statistical analysis                                                                                                                                                   | L.D.A. Paget                       | Orthopaedic<br>Surgery<br>Amsterdam UMC                                      |   | 10 Feb 2020       |
| TRIAL STATISTICIAN                                                                                                                                                                                     | Prof. S.M.A. Bierma-Zeinstra       | General Practice,<br>Erasmus University<br>Medical Center                    |   | 10 febr<br>2020   |
| Contributor to Statistical Analysis Plan                                                                                                                                                               | G. Reurink                         | Orthopaedic<br>Surgery<br>Amsterdam UMC                                      |   | 10 Feb 2020       |
| Contributor to Statistical Analysis Plan                                                                                                                                                               | R.J. de Vos                        | Orthopaedics and<br>Sports Medicine,<br>Erasmus University<br>Medical Center |  | 10 febr<br>2020   |
| Contributor to Statistical Analysis Plan                                                                                                                                                               | A. Weir                            | Orthopaedics and<br>Sports Medicine,<br>Erasmus University<br>Medical Center |  | <u>10-2-2020</u>  |



**1c. Revision History of the statistical analysis plan**

| Update statistical analysis plan version | Protocol version | Section number(s) changed | Description of and reason for changes | Date of approval |
|------------------------------------------|------------------|---------------------------|---------------------------------------|------------------|
| 1.0                                      | 4                | 0                         | 0                                     | 31-01-2020       |

**1.2. Planned period of observation**

The study included its first patient in August 2018 and aims to include the last patient by March 2020, consequently allowing analysis and then de-blinding of the coordinating researcher, principle investigator and fellow project members, to commence after the last follow-up (26 weeks) of the last patient by September 2020.

**2. Introduction**

**2.1. Background and rationale**

Platelet-rich Plasma (PRP) is a potentially efficacious treatment for ankle OA but its use has not been examined in high quality studies. Systematic reviews show that platelet-rich plasma (PRP) injections significantly decrease pain and improve function in knee OA patients. Ankle OA is more common than hip or knee OA in the young active population; with a prevalence of 3.4%. PRP injections in ankle OA are shown to be safe and improve quality of life over time, but no randomised controlled trial has been conducted. Our randomised controlled trial will evaluate the efficacy of PRP injections for symptom reduction and functional improvement, compared to placebo, in the treatment of ankle (talocrural) OA. The PRIMA trial is registered in the Netherlands trial Register: NTR7261 and its protocol has been published.<sup>1</sup>

## 2.2. Study Objectives

We aim to determine the efficacy of PRP injections in the management of ankle OA by comparing 2 groups, both receiving 2 injections of either: PRP or placebo solution. We hypothesize that PRP injections are efficacious for symptom reduction and functional improvement compared to placebo in the treatment of ankle (talocrural) OA.

## 3. Study Methods

### 3.1. Study Design

The PRIMA study is a multi-center, stratified, block-randomized, double-blind, placebo-controlled trial design will be conducted in order to compare two treatment groups: PRP vs Placebo (saline). After the 26 weeks follow-up of the last patient in the study, the coordinating researcher, principal investigator and fellow project members will be unblinded only after the analysis of the primary outcome. A flow chart of the design and follow-up is shown in figure 1.

### 3.2. Randomisation, Blinding and Treatment Allocation

In this study, patients will be randomised into two treatment groups: PRP injection or placebo saline injection. For each patient the coordinating researcher will prepare a PRP and a placebo injection (isotonic saline: 0.9% sodium chloride).

We will include patients at the centre of their first outpatient clinic appointment. For each patient the coordinating researcher will prepare a syringe with PRP and a syringe with placebo (isotonic saline: 0.9% sodium chloride). A Good Clinical Practice (GCP) approved data management system (Castor EDC, based in Amsterdam, the Netherlands) will be used to perform a computer generated block randomisation scheme with patients stratified to centre with a variable block size of 2,4 or 6. This procedure will ensure treatment allocation concealment. The coordinating researcher, treating

physician and patient all remain blinded to the allocated intervention. An independent researcher from the coordinating location will have access to the randomization result and the allocated intervention. This will be relayed to a GCP-certified research assistant at the centre. The research assistant then selects one of the two syringes based on the allocated intervention and blinds the syringe with a covering sheath, ensuring concealment of the content of the syringe. The patients, treating physicians, and coordinating researcher will all be blinded to the allocation of the intervention and to the contents of the syringe. The success of blinding will be assessed by asking patients which injection they think they have received just after the injection procedure, this will then be registered accordingly.

### 3.3. Sample Size

Based on previous and ongoing studies, the study protocol of the randomised controlled trial is designed to detect a difference of 12 points (0-100) on the AOFAS score. There is no official agreement on the minimal clinical important difference for the AOFAS score regarding ankle OA. However in relatable musculoskeletal literature, 10% – 15% of the used scale was reported.<sup>2-4</sup> Our pre-defined minimal clinical important difference of 12 % is located within this range.<sup>2-4</sup> Based on a previous placebo controlled RCT on injection therapy (hyaluronic acid) in ankle OA of De Groot et al. a standard deviation of 16.3 can be expected.<sup>5</sup> Taking into account a two-sided level of significance of 5%, a power of 90% and a dropout rate of 10%, approximately 50 (45 plus 10% drop out) patients per group will be needed (N=100 in total).

### 3.4. Hypothesis testing framework

The PRIMA trial uses a superiority hypothesis testing framework for all primary and secondary outcomes.

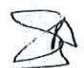

### 3.5. Interim Analysis

No interim analyses will be performed as the study has been classified as low-risk. All adverse events reported spontaneously by the patient or observed by the investigator or his staff will be recorded. A variety of conditions have been treated with PRP ranging from muscle and tendon injuries to intra-articular injections of the knee and ankle. To date, no serious adverse events have been documented in the literature, concerning PRP intra-articular injections of the ankle. In accordance with the Central Committee on Research Involving Human Subjects (CCMO) guidelines, this study was classified as low-risk for adverse events. Therefore, the local Medical Ethical Commission will be notified of any serious adverse events. In the event this happens, the advice of the Medical Ethical Commission will be followed accordingly.

### 3.6. Start statistical analysis of data

The current estimate is that the final patient will be included in the study in March 2020. We therefore expect to perform the statistical analysis for both primary and secondary outcomes at 26 weeks follow-up in September 2020.

### 3.7. Time points

| Table 1. Follow-up |                                                                                                                                                                                                  |
|--------------------|--------------------------------------------------------------------------------------------------------------------------------------------------------------------------------------------------|
| Baseline           | <ul style="list-style-type: none"> <li>- 1<sup>st</sup> Intervention injections</li> <li>- Physical Examination</li> <li>- AOFAS</li> <li>- PROMs</li> <li>- PRODISQ cost-effectivity</li> </ul> |

|          |                                                                                                                                                             |
|----------|-------------------------------------------------------------------------------------------------------------------------------------------------------------|
| 6 weeks  | <ul style="list-style-type: none"> <li>- 2<sup>nd</sup> intervention injection</li> <li>- Physical Examination</li> <li>- AOFAS</li> <li>- PROMs</li> </ul> |
| 12 weeks | <ul style="list-style-type: none"> <li>- AOFAS</li> <li>- PROMs</li> <li>- PRODISQ cost-effectivity</li> </ul>                                              |
| 26 weeks | <ul style="list-style-type: none"> <li>- Physical Examination</li> <li>- AOFAS</li> <li>- PROMs</li> <li>- PRODISQ cost-effectivity</li> </ul>              |
| 39 weeks | <ul style="list-style-type: none"> <li>- PRODISQ cost-effectivity</li> </ul>                                                                                |
| 52 weeks | <ul style="list-style-type: none"> <li>- AOFAS</li> <li>- PROMs</li> <li>- PRODISQ cost-effectivity</li> </ul>                                              |
| 5 years  | <ul style="list-style-type: none"> <li>- AOFAS</li> <li>- PROMs</li> </ul>                                                                                  |

*Table 1. In addition to the American Orthopaedic Foot and Ankle Society (AOFAS) score, the following PROMs will be taken: Foot and Ankle Outcome Score (FAOS), Ankle Osteoarthritis Score (AOS), Visual Analogue Scale (VAS), Ankle activity score (AAS), Subjective patient satisfaction, Short Form Health Survey (SF-36), The Global Attainment Scaling (GAS), EuroQol-5 dimensions-3 levels (EQ-5D-3L). These PROMs will be elaborated on further on. Furthermore the PROductivity and DISease Questionnaire (PRODISQ) will be used to perform a cost-effectivity analysis. These questionnaires can be found in appendix 1*

## 4. Statistical Principles

A statistically significant difference between both treatment groups (placebo or PRP), regarding primary and secondary outcomes, will be determined if the two-sided p-values are less than 0.05. A 95% confidence interval will be provided for primary and secondary outcome measures. No adjustment will be made for multiplicity as there is only one primary outcome measured at a single time point. Protocol deviations will be listed according to treatment group. This will also be presented as a percentage and number of patients in each treatment group having experienced a protocol deviation. The intention to treat population includes all participants randomized, regardless of protocol deviation.

After the 26 weeks follow-up of the last patient in the study, a standard operating procedure will be available to logically recode and clean the data. The data will be interpreted according to a blinded data interpretation scheme described by Järvinen et al.<sup>6</sup> A statistical expert (SB) is present among the authors. The authors will interpret the statistical results until a consensus is reached. Once the authors are in agreement, the two groups will be unblinded and no changes will be made to the interpretation of the results. Thus the principal investigator, coordinating researcher and other project members will be unblinded only after the analysis of the primary outcome. Patients will be unblinded 1 year after the 1 year follow-up of the last patient.

## 5. Study Populations

### 5.1. Inclusion and exclusion criteria

Patients with ankle OA in University Medical Centres, teaching hospitals, general hospitals and private specialist clinics will be informed about the study. In order to participate, patients must meet the eligibility criteria documented below.

### Inclusion criteria

1. Severity of Ankle OA pain on a visual analogue scale (VAS) (0–100 mm)  $\geq$  40 mm during daily activities
2. X-rays (anteroposterior (AP) and lateral view) indicating  $\geq$  grade 2 talocrural OA on the Van Dijk classification (clarified under section Radiographs)<sup>7</sup>
3. Age  $\geq$  18 years

### Exclusion criteria

1. Patient has received injection therapy for ankle OA in the previous 6 months
2. Patient does not want to receive one of the two therapies
3. Patient has clinical signs of concomitant OA of one or more other major joints of the lower extremities that negatively affects their daily activity level
4. Previous ankle surgery for OA or Osteochondral defects (OCD)  $<$  1 year (not including surgery for an ankle fracture in the past)

### Radiographs

AP and lateral X-rays of the talocrural joints will be scored according to the Van Dijk classification:<sup>7</sup>

- 0) Normal joint or subchondral sclerosis
- 1) Osteophytes without joint space narrowing
- 2) Joint space narrowing with or without osteophytes
- 3) (Sub)total disappearance or deformation of the joint space

## 5.2. Planned information for flowchart

A flowchart will present the patients that were screened, met the inclusion criteria, were excluded, randomised and allocated to each study arm, withdrawing from the study (with reason and timing) and assessed for primary outcome.

## 5.3. Loss to follow-up

The coordinating researcher will attempt to limit loss to follow-up as much as possible by contacting every patient and being present at every patient visit. All digital questionnaires will be constantly monitored to ensure they are being filled in and otherwise followed up by the coordinating researcher. In the event of patient withdrawal, an analysis of demographic and prognostic characteristics will be done on these cases and the remaining patients. As previously described by Järvinen et al, we will document the patient eligible for and compliant with each follow-up.<sup>6</sup>

# 6. Analysis

## 6.1. Outcome measures

### **Baseline characteristics**

Baseline characteristics including age, gender, weight, length, van Dijk classification at inclusion, duration of ankle symptoms and previous ankle injury (ipsilateral ankle), ankle with OA (left or right), level of sports, weekly sport participation, Ankle ROM and anterior drawer test, will be collected for all participants.

### **Primary study parameter/endpoint**

The primary objective of this study will be to quantify pain or functional improvement using the American Orthopaedic Foot and Ankle Society (AOFAS) score at 26 weeks follow-up. Studies





evaluating the efficacy of PRP in knee OA maintained a follow-up between 3 and 12 months. We therefore opted to take 26 weeks for our primary outcome measure.<sup>8</sup> The AOFAS is a validated scale for ankle OA (0-100) measuring three subdomains (pain, function and alignment) which together total nine items.<sup>9-12</sup> The subdomain of pain is measured by one item where a maximal score of 40 indicates no pain. Function consists of 7 items where full function is indicated by the maximal score of 50 points. Similar to the pain subdomain, alignment has a potential maximum score of 10 points using one item, indicating good alignment.<sup>9,10</sup> The AOFAS questionnaire, having undergone forward and backward translation to Dutch by de Boer et al. 2017, has an excellent internal consistency (Cronbach's  $\alpha$  0.947) and an excellent test-retest reliability (ICC 0.93).<sup>9</sup>

### **Secondary study parameters/endpoints**

Secondary outcome measures are a number of other Patient Reported Outcome Measures (PROMs).

Specific time points of the secondary outcome measures can be found in Table 1.

1. Ankle Osteoarthritis Score (AOS) is a visual analog scale from 0 – 100 mm with 18 questions; 9 relating to pain and 9 relating to disability.<sup>13</sup>
2. Foot and Ankle Outcome Score (FAOS). Each question is assigned 0 – 4 points based on the answer given. The scale runs from 0 (extreme symptoms) to 100 points (no symptoms).<sup>14</sup>
3. In order to evaluate pain, the pain sub-scale of AOFAS (0-40 points) will be analysed. On this scale the lower the score the more pain the patient has. Additionally a VAS score (VAS 0-100 mm) is measured during activities of daily living, with 0 mm being no pain and 100 mm the worst pain imaginable.<sup>10,15</sup>
4. Total AOFAS score at the other time points than the primary one (at 6, 12 and 52 weeks as well as 5 years).<sup>10,15</sup>
5. Ankle activity score (0-10 points) is scored according to chart based on the performable activity level.<sup>16</sup>
6. Subjective patient satisfaction (4 categories) Poor, Fair, Good, Excellent

7. Short Form Health Survey SF-36 is a health-related quality of life score (0-100 points). The higher the patient scores, the higher the disability.<sup>17</sup>
8. The Global Attainment Scaling (GAS) is a method of scoring based on achievement related to pre-determined goals in agreement with the patient. Points are subtracted for not achieving the pre-defined goals or vice versa. Scores range from 100 (high functioning) to 0 (severely impaired).<sup>18</sup>
9. EuroQol-5 dimensions-3 levels (EQ-5D-3L) utility score allows a patient's health to be defined by a 5-digit number.<sup>19</sup>
10. PROductivity and DISease Questionnaire (PRODISQ) will be used to determine indirect costs and direct costs cost effectivity. The PRODISQ questionnaire is taken at baseline and every 3 months thereafter up until 1 year. This will be done in conjunction with the EQ-5D-3L.<sup>20</sup>

## 6.2. Analysis method

### Baseline characteristics

Baseline characteristics will be reported between groups using descriptive statistics.

### Primary outcome measure

Analysis will be performed using an intention to treat approach. To test for the effect of treatment on the between-group difference in primary outcome, we will use a repeated measurement general linear model. Changes from baseline to all follow-up time points will be included in the model.

Adjustments will be made for those baseline variables that influenced the primary outcome with  $p < 0.10$ .

### Secondary outcome measures

To test for the effect of treatment on between-group differences in secondary outcomes, we will use the repeated measurement general linear model. Changes from baseline to all follow-up time points will be included in the model.

### Economic analysis

In the event of a positive significant outcome in favour of the PRP group, an economic analysis is needed to support a possible change of practice. An economic analysis (costs) will be performed in order to determine cost-effectiveness.

We will assess the differences in mean quality-adjusted life years (QALYs), costs, and net benefits between the PRP injection group and the placebo group using linear models. We express the cost-effectiveness by using cost-effectiveness acceptability curves from both a healthcare perspective and a societal perspective. With multiple bootstrap replicates of the average difference in costs and effects in the incremental cost-effectiveness plane we will express the uncertainty of our cost-effectiveness analysis.

The cost-effectivity analysis will be performed with a 1-year time horizon. We use the three-level EQ-5D questionnaire (Euroqol, Rotterdam, the Netherlands) to calculate QALYs as the area under the curve of the utility scores measured over 12 months, according to the Dutch pricing system. The analysis will be based on indirect costs and direct costs and will be determined using the PRODISQ questionnaire. The PRODISQ questionnaire is taken at baseline and every 3 months thereafter up until 1 year.

### 6.3. Missing Data

Missing items of a score will be handled according to the instructions of the specific scales. In the event of no instructions, we will calculate the percentage of missing items on a scale. Due to the



potential impact on trial conclusions, multiple imputation (if >10% missing items on a scale) will be applied. Multiple imputation will be based on age, sex, allocation and earlier scores in the appropriate scale. Single imputation by last observation carried forward (LOCF) will be applied if the missing data is within 10 weeks of the last observation. Argumentation for application of LOCF will be presented descriptively. Little's Missing Completely at Random (MCAR) test will be performed in order to allow us to assume that the missing data is "missing at random" (MAR). Due to the potential impact on trial conclusions, a sensitivity analysis will be performed if missing data is more than 5%.

### 6.3. Statistical software

Analysis will be performed in IBM SPSS statistics for windows.

## 7. References to literature, standard operating procedures and reporting guidelines

### 7.1. Data Management Plan

The current data management plan is called: "RDM F01 Data Management Plan\_version 1\_01102018" Version 1; dated 1-10-2018 in the digital trial master file

(G:\divb\orthopedie\orca\PRIMA-study\PRIMA Trial\16. Data Management\16.1 Forms and documentation).

### 7.2. Data storage

Following extraction from CASTORedc, the syntax files will be stored at the digital location

G:\divb\orthopedie\orca\PRIMA-study\7.2. Standard Operating Procedure

The Standard Operating Procedure (SOP) will be followed when using and analysing the data.



File name: SOP RDM001 Research data management v3.0

Location: G:\divb\orthopedie\orca\PRIMA-study\PRIMA Trial\15. Monitoring-Audits

### 7.3. Reporting Guidelines

Results of the PRIMA trial will be presented in accordance with the CONSolidation Standards Of Reporting Trials (CONSORT) guidelines.

## 8. References

1. Paget LDA, Bierma-Zeinstra SMA, Goedegebuure S, et al. Platelet-Rich plasma Injection Management for Ankle osteoarthritis study (PRIMA): Protocol of a Dutch multicentre, stratified, block-randomised, double-blind, placebo-controlled trial. *BMJ Open*. 2019. doi:10.1136/bmjopen-2019-030961
2. Pham T, van der Heijde D, Altman RD, et al. OMERACT-OARSI initiative: Osteoarthritis research society international set of responder criteria for osteoarthritis clinical trials revisited. *Osteoarthr Cartil*. 2004. doi:10.1016/j.joca.2004.02.001
3. Rozendaal RM, Koes BW, Van Osch GJVM, et al. Effect of glucosamine sulfate on hip osteoarthritis: A randomized trial. *Ann Intern Med*. 2008. doi:10.7326/0003-4819-148-4-200802190-00005
4. de Vos RJ, Weir A, van Schie HTM, et al. Platelet-rich plasma injection for chronic Achilles tendinopathy: a randomized controlled trial. *JAMA*. 2010;303(2):144-149. doi:10.1001/jama.2009.1986
5. DeGroot H, Uzunishvili S, Weir R, Al-omari A, Gomes B. Intra-articular injection of hyaluronic acid is not superior to saline solution injection for ankle arthritis: a randomized, double-blind,



placebo-controlled study. *J Bone Joint Surg Am.* 2012;94(1):2-8. doi:10.2106/JBJS.J.01763

6. Järvinen TLN, Sihvonen R, Bhandari M, et al. Blinded interpretation of study results can feasibly and effectively diminish interpretation bias. *J Clin Epidemiol.* 2014;67(7):769-772. doi:10.1016/j.jclinepi.2013.11.011
7. van Dijk CN, Verhagen R a, Tol JL. Arthroscopy for problems after ankle fracture. *J Bone Jt Surg.* 1997;79-B(2):280-284. doi:10.1302/0301-620X.79B2.7153
8. Xing D, Wang B, Zhang W, et al. Intra-articular platelet-rich plasma injections for knee osteoarthritis: An overview of systematic reviews and risk of bias considerations. *Int J Rheum Dis.* 2017;20(11):1612-1630. doi:10.1111/1756-185X.13233
9. De Boer AS, Tjioe RJC, Van Der Sijde F, et al. The American Orthopaedic Foot and Ankle Society Ankle-Hindfoot Scale; Translation and validation of the Dutch language version for ankle fractures. *BMJ Open.* 2017;7(8):1-12. doi:10.1136/bmjopen-2017-017040
10. Kitaoka HB, Alexander IJ, Adelaar RS, Nunley JA, Myerson MS, Sanders M. Clinical rating systems for the ankle-hindfoot, midfoot, hallux, and lesser toes. *Foot ankle Int.* 1994;15(7):349-353. doi:10.1177/107110079401500701
11. Sayyed-Hosseini S-H, Hassankhani GG, Bagheri F, Alavi N, Shojaie B, Mousavian A. Validation of the Persian Version of the American Orthopedic Foot and Ankle Society Score (AOFAS) Questionnaire. *Arch bone Jt Surg.* 2018;6(3):233-239. doi:10.1097/PHM.0000000000000234
12. Vosoughi AR, Roustaei N, Mahdavi azad H. American Orthopaedic Foot and Ankle Society ankle-hindfoot scale: A cross-cultural adaptation and validation study from Iran. *Foot Ankle Surg.* 2018. doi:10.1016/j.fas.2017.02.007
13. Domsic RT, Saltzman CL. Ankle osteoarthritis scale. *Foot Ankle Int.* 1998. doi:10.1177/107110079801900708



14. Roos EM, Brandsson S, Karlsson J. Validation of the foot and ankle outcome score for ankle ligament reconstruction. *Foot Ankle Int.* 2001. doi:10.1177/107110070102201004
15. Van Lieshout EMM, De Boer AS, Meuffels DE, et al. American Orthopaedic Foot and Ankle Society (AOFAS) Ankle-Hindfoot Score: A study protocol for the translation and validation of the Dutch language version. *BMJ Open.* 2017. doi:10.1136/bmjopen-2016-012884
16. Halasi T, Kynsburg Á, Tállay A, Berkes I. Development of a new activity score for the evaluation of ankle instability. *Am J Sports Med.* 2004. doi:10.1177/0363546503262181
17. Ware JE, Snow KK, Kosinski M, Gandek B. SF-36 Health Survey Manual and Interpretation Guide. *Bost New Engl Med Cent.* 1993.
18. Kiresuk TJ, Sherman RE. Goal attainment scaling: A general method for evaluating comprehensive community mental health programs. *Community Ment Health J.* 1968. doi:10.1007/BF01530764
19. Lamers LM, Stalmeier PFM, McDonnell J, Krabbe PFM, van Busschbach JJ. [Measuring the quality of life in economic evaluations: the Dutch EQ-5D tariff]. *Ned Tijdschr Geneesk.* 2005.
20. Koopmanschap MA. PRODISQ: A modular questionnaire on productivity and disease for economic evaluation studies. *Expert Rev Pharmacoeconomics Outcomes Res.* 2005. doi:10.1586/14737167.5.1.23



# Statistical Analysis Plan

Platelet-Rich plasma Injection Management for Ankle osteoarthritis study  
 (PRIMA): protocol of a Dutch multicentre, stratified, block-randomised,  
 double-blind, placebo-controlled trial

|                                                      |                                    |                                                                           |                                                                                     |                   |
|------------------------------------------------------|------------------------------------|---------------------------------------------------------------------------|-------------------------------------------------------------------------------------|-------------------|
| Dutch Trial Register                                 | NTR7261 (registered<br>2018-06-06) | METC ABR                                                                  | 2018-042                                                                            |                   |
| SAP Version                                          | 3                                  | SAP Version Date                                                          | 26-11-2020                                                                          |                   |
| Role of Contributor                                  | Name                               | Affiliation                                                               | Signature                                                                           | Date of Signature |
| Principal Investigator                               | Prof. J.L. Tol                     | Orthopaedic Surgery<br>Amsterdam UMC                                      |   | 30-11-2020        |
| Researcher who will perform the statistical analysis | L.D.A. Paget                       | Orthopaedic Surgery<br>Amsterdam UMC                                      |  | 30-11-2020        |
| TRIAL STATISTICIAN                                   | Prof. S.M.A. Bierma-Zeinstra       | General Practice,<br>Erasmus University<br>Medical Center                 |  | 13-12-2020        |
| Contributor to Statistical Analysis Plan             | G. Reurink                         | Orthopaedic Surgery<br>Amsterdam UMC                                      |  | 30-11-2020        |
| Contributor to Statistical Analysis Plan             | R.J. de Vos                        | Orthopaedics and Sports Medicine,<br>Erasmus University<br>Medical Center |  | 26-11-2020        |
| Contributor to Statistical Analysis Plan             | A. Weir                            | Orthopaedics and Sports Medicine,<br>Erasmus University<br>Medical Center |  | 26-11-2020        |



## 1c. Revision History of the statistical analysis plan

| Update statistical analysis plan version | Protocol version | Section number(s) changed | Description of and reason for changes                                         | Date of approval |
|------------------------------------------|------------------|---------------------------|-------------------------------------------------------------------------------|------------------|
| 1.0                                      | 4                | 0                         | 0                                                                             | 31-01-2020       |
| 2.0                                      | 5                | 3.8<br>6.3                | Amendment due to COVID-19 pandemic                                            | 22-06-2020       |
| 3.0                                      | 5                | 6.1                       | Additional radiological baselines variables to check as potential confounders | 26-11-2020       |

### 1.2. Planned period of observation

The study included its first patient in August 2018 and aims to include the last patient by March 2020, consequently allowing analysis and then de-blinding of the coordinating researcher, principle investigator and fellow project members, to commence after the last follow-up (26 weeks) of the last patient by September 2020.

## 2. Introduction

### 2.1. Background and rationale

Platelet-rich Plasma (PRP) is a potentially efficacious treatment for ankle OA but its use has not been examined in high quality studies. Systematic reviews show that platelet-rich plasma (PRP) injections significantly decrease pain and improve function in knee OA patients. Ankle OA is more common than hip or knee OA in the young active population; with a prevalence of 3.4%. PRP injections in ankle OA are shown to be safe and improve quality of life over time, but no randomised controlled trial has been conducted. Our randomised controlled trial will evaluate the efficacy of PRP injections

for symptom reduction and functional improvement, compared to placebo, in the treatment of ankle (talocrural) OA. The PRIMA trial is registered in the Netherlands trial Register: NTR7261 and its protocol has been published.<sup>1</sup>

## 2.2. Study Objectives

We aim to determine the efficacy of PRP injections in the management of ankle OA by comparing 2 groups, both receiving 2 injections of either: PRP or placebo solution. We hypothesize that PRP injections are efficacious for symptom reduction and functional improvement compared to placebo in the treatment of ankle (talocrural) OA.

## 3. Study Methods

### 3.1. Study Design

The PRIMA study is a multi-center, stratified, block-randomized, double-blind, placebo-controlled trial design will be conducted in order to compare two treatment groups: PRP vs Placebo (saline). After the 26 weeks follow-up of the last patient in the study, the coordinating researcher, principal investigator and fellow project members will be unblinded only after the analysis of the primary outcome. A flow chart of the design and follow-up is shown in figure 1.

### 3.2. Randomisation, Blinding and Treatment Allocation

In this study, patients will be randomised into two treatment groups: PRP injection or placebo saline injection. For each patient the coordinating researcher will prepare a PRP and a placebo injection (isotonic saline: 0.9% sodium chloride).

We will include patients at the centre of their first outpatient clinic appointment. For each patient the coordinating researcher will prepare a syringe with PRP and a syringe with placebo (isotonic saline: 0.9% sodium chloride). A Good Clinical Practice (GCP) approved data management system (Castor EDC, based in Amsterdam, the Netherlands) will be used to perform a computer generated block randomisation scheme with patients stratified to centre with a variable block size of 2,4 or 6. This procedure will ensure treatment allocation concealment. The coordinating researcher, treating

physician and patient all remain blinded to the allocated intervention. An independent researcher from the coordinating location will have access to the randomization result and the allocated intervention. This will be relayed to a GCP-certified research assistant at the centre. The research assistant then selects one of the two syringes based on the allocated intervention and blinds the syringe with a covering sheath, ensuring concealment of the content of the syringe. The patients, treating physicians, and coordinating researcher will all be blinded to the allocation of the intervention and to the contents of the syringe. The success of blinding will be assessed by asking patients which injection they think they have received just after the injection procedure, this will then be registered accordingly.

### 3.3. Sample Size

Based on previous and ongoing studies, the study protocol of the randomised controlled trial is designed to detect a difference of 12 points (0-100) on the AOFAS score. There is no official agreement on the minimal clinical important difference for the AOFAS score regarding ankle OA. However in reliable musculoskeletal literature, 10% – 15% of the used scale was reported.<sup>2-4</sup> Our pre-defined minimal clinical important difference of 12 % is located within this range.<sup>2-4</sup> Based on a previous placebo controlled RCT on injection therapy (hyaluronic acid) in ankle OA of De Groot et al. a standard deviation of 16.3 can be expected.<sup>5</sup> Taking into account a two-sided level of significance of 5%, a power of 90% and a dropout rate of 10%, approximately 50 (45 plus 10% drop out) patients per group will be needed (N=100 in total).

### 3.4. Hypothesis testing framework

The PRIMA trial uses a superiority hypothesis testing framework for all primary and secondary outcomes.

### 3.5. Interim Analysis

No interim analyses will be performed as the study has been classified as low-risk. All adverse events reported spontaneously by the patient or observed by the investigator or his staff will be recorded. A variety of conditions have been treated with PRP ranging from muscle and tendon injuries to intra-articular injections of the knee and ankle. To date, no serious adverse events have been documented in the literature, concerning PRP intra-articular injections of the ankle. In accordance with the Central Committee on Research Involving Human Subjects (CCMO) guidelines, this study was classified as low-risk for adverse events. Therefore, the local Medical Ethical Commission will be notified of any serious adverse events. In the event this happens, the advice of the Medical Ethical Commission will be followed accordingly.

### 3.6. Start statistical analysis of data

The current estimate is that the final patient will be included in the study in March 2020. We therefore expect to perform the statistical analysis for both primary and secondary outcomes at 26 weeks follow-up in September 2020.

### 3.7. Time points

| <b>Table 1. Follow-up</b> |                                                                                                                                                                                                  |
|---------------------------|--------------------------------------------------------------------------------------------------------------------------------------------------------------------------------------------------|
| Baseline                  | <ul style="list-style-type: none"> <li>- 1<sup>st</sup> intervention injections</li> <li>- Physical Examination</li> <li>- AOFAS</li> <li>- PROMs</li> <li>- PRODISQ cost-effectivity</li> </ul> |

|          |                                                                                                                                                             |
|----------|-------------------------------------------------------------------------------------------------------------------------------------------------------------|
| 6 weeks  | <ul style="list-style-type: none"> <li>- 2<sup>nd</sup> intervention injection</li> <li>- Physical Examination</li> <li>- AOFAS</li> <li>- PROMs</li> </ul> |
| 12 weeks | <ul style="list-style-type: none"> <li>- AOFAS</li> <li>- PROMs</li> <li>- PRODISQ cost-effectivity</li> </ul>                                              |
| 26 weeks | <ul style="list-style-type: none"> <li>- Physical Examination</li> <li>- AOFAS</li> <li>- PROMs</li> <li>- PRODISQ cost-effectivity</li> </ul>              |
| 39 weeks | <ul style="list-style-type: none"> <li>- PRODISQ cost-effectivity</li> </ul>                                                                                |
| 52 weeks | <ul style="list-style-type: none"> <li>- AOFAS</li> <li>- PROMs</li> <li>- PRODISQ cost-effectivity</li> </ul>                                              |
| 5 years  | <ul style="list-style-type: none"> <li>- AOFAS</li> <li>- PROMs</li> </ul>                                                                                  |

*Table 1. In addition to the American Orthopaedic Foot and Ankle Society (AOFAS) score, the following PROMs will be taken: Foot and Ankle Outcome Score (FAOS), Ankle Osteoarthritis Score (AOS), Visual Analogue Scale (VAS), Ankle activity score (AAS), Subjective patient satisfaction, Short Form Health Survey (SF-36), The Global Attainment Scaling (GAS), EuroQol-5 dimensions-3 levels (EQ-5D-3L). These PROMs will be elaborated on further on. Furthermore the PROductivity and DISease Questionnaire (PRODISQ) will be used to perform a cost-effectivity analysis. These questionnaires can be found in appendix 1*

### 3.8. Amendment due to COVID-19 pandemic

To prevent potential immediate hazard to the patients and in compliance with the institutional and national Covid-19 -related clinical research regulations, we deviated from the protocol and replaced patients following Institutional Review Board (IRB) (in Dutch: Medisch Ethische Toetsingscommissie) approval date 6-5-2020.<sup>6,7</sup>

During the COVID-19 pandemic, 12 received their first intervention (intra-articular injection), but these patients had no access to receiving their second injection at the pre-defined 6 week time-interval. Following consultation with the head of the department and/or local principal investigators, considering the risks and descaling of elective patient bound activities, we found the COVID-19 associated potential risks to outweigh the potential damage due to the disease for which they had no access to the intervention.

As in-person visits are required for administration of the investigational products (intra-articular injections), protection of a participant's safety, welfare, and rights is best served by discontinuing the administration or use of the investigational product and subsequent participation in the trial.<sup>(1,2)</sup> In order to minimise protocol deviations, maintain the previously calculated sample size of 100 patients, we asked IRB approval for replacing them with 12 new inclusions. Following IRB approval we will start including patients as soon as (1) out-patient non-COVID-19 care was scaled up, (2) there was approval from the local head of the department and/or local principal investigator and (3) the local regulations permitted. By doing this, we accounted for the potential risks for patients and documented this accordingly in an emergency risk management plan. At the start of the trial we did not anticipate that a substantial number of patients who were randomised into the trial would subsequently be unable to undergo the intervention (due to the Covid-19 crisis). By asking the IRB approval for replacing these patients that had no access to the intervention, due to COVID-19 regulations, we minimize potential bias, as:

- Allocation to the treatment or control arm will not have influenced the discontinuation of trial participation (internal validity).
- We will follow the similar recruitment procedure of consecutive patients after the COVID-19 ban has been stopped and therefore the newly included patients are expected to be representative for the same population as the patients for whom the trial participation has been discontinued (external validity).

Participation of these 12 patients will be discontinued and they will be informed by written letter, e-mail and/or telephone call. The monitoring body will be informed within 48 hours following IRB approval.

The Sponsor and clinical investigators will document how restrictions related to COVID-19 led to the changes in study conduct and duration of those changes and indicate which and how trial patients will be impacted. We will capture specific information in the case report form that explains the basis of potential missing data, including the relationship to COVID-19 for missing protocol-specified information (e.g., from missed study visits or study discontinuations due to COVID-19). This information, will be summarized in the clinical study report.

The proposed IRB amendment (submitted on 14-4-2020, approved 6-5-2020) with changes in the protocol will be updated in the data management and/or statistical analysis plan amendments. Prior to locking the database, we will address in the statistical analysis plan how protocol deviations related to COVID-19 will be handled for the pre-specified analyses.

In these extreme circumstances, we are confronted with a crisis and are forced to think of solutions in order to maintain the quality of the study. The European Committee for Human Medicinal Products, recommend collection of as much data as possible. In the current situation we find the trial load for patients no longer participating too heavy and thus unethical. Consequently, we will



limit data collection in these patients to the primary outcome measure, AOFAS at 26 weeks (1x 10 min by videoconsult).

## 4. Statistical Principles

A statistical significant difference between both treatment groups (placebo or PRP), regarding primary and secondary outcomes, will be determined if the two sided p-values are less than 0.05. A 95% confidence interval will be provided for primary and secondary outcome measures. No adjustment will be made for multiplicity as there is only one primary outcome measured at a single time point. Protocol deviations will be listed according to treatment group. This will also be presented as a percentage and number of patients in each treatment group having experienced a protocol deviation. The intention to treat population includes all participants randomized, regardless of protocol deviation.

After the 26 weeks follow-up of the last patient in the study, a standard operating procedure will be available to logically recode and clean the data. The data will be interpreted according to a blinded data interpretation scheme described by Järvinen et al.<sup>8</sup> A statistical expert (SB) is present among the authors. The authors will interpret the statistical results until a consensus is reached. Once the authors are in agreement, the two groups will be unblinded and no changes will be made to the interpretation of the results. Thus the principal investigator, coordinating researcher and other project members will be unblinded only after the analysis of the primary outcome. Patients will be unblinded 1 year after the 1 year follow-up of the last patient.

## 5. Study Populations

### 5.1. Inclusion and exclusion criteria

Patients with ankle OA in University Medical Centres, teaching hospitals, general hospitals and private specialist clinics will be informed about the study. In order to participate, patients must meet the eligibility criteria documented below.

#### Inclusion criteria

1. Severity of Ankle OA pain on a visual analogue scale (VAS) (0–100 mm)  $\geq$  40 mm during daily activities
2. X-rays (anteroposterior (AP) and lateral view) indicating  $\geq$  grade 2 talocrural OA on the Van Dijk classification (clarified under section Radiographs)<sup>9</sup>
3. Age  $\geq$  18 years

#### Exclusion criteria

1. Patient has received injection therapy for ankle OA in the previous 6 months
2. Patient does not want to receive one of the two therapies
3. Patient has clinical signs of concomitant OA of one or more other major joints of the lower extremities that negatively affects their daily activity level
4. Previous ankle surgery for OA or Osteochondral defects (OCD)  $<$  1 year (not including surgery for an ankle fracture in the past)

#### Radiographs

AP and lateral X-rays of the talocrural joints will be scored according to the Van Dijk classification:<sup>9</sup>

- 0) Normal joint or subchondral sclerosis
- 1) Osteophytes without joint space narrowing

- 2) Joint space narrowing with or without osteophytes
- 3) (Sub)total disappearance or deformation of the joint space

## 5.2. Planned information for flowchart

A flowchart will present the patients that were screened, met the inclusion criteria, were excluded, randomised and allocated to each study arm, withdrawing from the study (with reason and timing) and assessed for primary outcome.

## 5.3. Loss to follow-up

The coordinating researcher will attempt to limit loss to follow-up as much as possible by contacting every patient and being present at every patient visit. All digital questionnaires will be constantly monitored to ensure they are being filled in and otherwise followed up by the coordinating researcher. In the event of patient withdrawal, an analysis of demographic and prognostic characteristics will be done on these cases and the remaining patients. As previously described by Järvinen et al, we will document the patient eligible for and compliant with each follow-up.<sup>8</sup>

# 6. Analysis

## 6.1. Outcome measures

### Baseline characteristics

Baseline characteristics including age, gender, weight, length, whether x-ray is weighted or non-weighted<sup>10</sup>, Medial distal tibial angle,<sup>11-13</sup> talar tilt,<sup>11-13</sup> van Dijk classification,<sup>9</sup> Kellgren-Lawrence classification<sup>14</sup> and the Takakura classification<sup>15,16</sup> at inclusion, duration of ankle symptoms and

previous ankle injury (ipsilateral ankle), ankle with OA (left or right), level of sports, weekly sport participation, Ankle ROM and anterior drawer test, will be collected for all participants.

### Primary study parameter/endpoint

The primary objective of this study will be to quantify pain or functional improvement using the American Orthopaedic Foot and Ankle Society (AOFAS) score at 26 weeks follow-up. Studies evaluating the efficacy of PRP in knee OA maintained a follow-up between 3 and 12 months. We therefore opted to take 26 weeks for our primary outcome measure.<sup>17</sup> The AOFAS is a validated scale for ankle OA (0-100) measuring three subdomains (pain, function and alignment) which together total nine items.<sup>18-21</sup> The subdomain of pain is measured by one item where a maximal score of 40 indicates no pain. Function consists of 7 items where full function is indicated by the maximal score of 50 points. Similar to the pain subdomain, alignment has a potential maximum score of 10 points using one item, indicating good alignment.<sup>18,19</sup> The AOFAS questionnaire, having undergone forward and backward translation to Dutch by de Boer et al. 2017, has an excellent internal consistency (Cronbach's  $\alpha$  0.947) and an excellent test-retest reliability (ICC 0.93).<sup>18</sup>

### Secondary study parameters/endpoints

Secondary outcome measures are a number of other Patient Reported Outcome Measures (PROMs). Specific time points of the secondary outcome measures can be found in Table 1.

1. Ankle Osteoarthritis Score (AOS) is a visual analog scale from 0 – 100 mm with 18 questions; 9 relating to pain and 9 relating to disability.<sup>22</sup>
2. Foot and Ankle Outcome Score (FAOS). Each question is assigned 0 – 4 points based on the answer given. The scale runs from 0 (extreme symptoms) to 100 points (no symptoms).<sup>23</sup>
3. In order to evaluate pain, the pain sub-scale of AOFAS (0-40 points) will be analysed. On this scale the lower the score the more pain the patient has. Additionally a VAS score (VAS 0-100 mm) is measured during activities of daily living, with 0 mm being no pain and 100 mm the worst pain imaginable.<sup>19,24</sup>

4. Total AOFAS score at the other time points than the primary one (at 6, 12 and 52 weeks as well as 5 years).<sup>19,24</sup>
5. Ankle activity score (0-10 points) is scored according to chart based on the performable activity level.<sup>25</sup>
6. Subjective patient satisfaction (4 categories) Poor, Fair, Good, Excellent
7. Short Form Health Survey SF-36 is a health-related quality of life score (0-100 points). The higher the patient scores, the higher the disability.<sup>26</sup>
8. The Global Attainment Scaling (GAS) is a method of scoring based on achievement related to pre-determined goals in agreement with the patient. Points are subtracted for not achieving the pre-defined goals or vice versa. Scores range from 100 (high functioning) to 0 (severely impaired).<sup>27</sup>
9. EuroQol-5 dimensions-3 levels (EQ-5D-3L) utility score allows a patient's health to be defined by a 5-digit number.<sup>28</sup>
10. PROductivity and DISease Questionnaire (PRODISQ) will be used to determine indirect costs and direct costs cost effectivity. The PRODISQ questionnaire is taken at baseline and every 3 months thereafter up until 1 year. This will be done in conjunction with the EQ-5D-3L.<sup>29</sup>

## 6.2. Analysis method

### Baseline characteristics

Baseline characteristics will be reported between groups using descriptive statistics.

### Primary outcome measure

Analysis will be performed using an intention to treat approach. To test for the effect of treatment on the between-group difference in primary outcome, we will use a repeated measurement general linear model. Changes from baseline to all follow-up time points will be included in the model.

Adjustments will be made for those baseline variables that influenced the primary outcome with  $p < 0.10$ .

### Secondary outcome measures

To test for the effect of treatment on between-group differences in secondary outcomes, we will use the repeated measurement general linear model. Changes from baseline to all follow-up time points will be included in the model.

### Economic analysis

In the event of a positive significant outcome in favour of the PRP group, an economic analysis is needed to support a possible change of practice. An economic analysis (costs) will be performed in order to determine cost-effectiveness.

We will assess the differences in mean quality-adjusted life years (QALYs), costs, and net benefits between the PRP injection group and the placebo group using linear models. We express the cost-effectiveness by using cost-effectiveness acceptability curves from both a healthcare perspective and a societal perspective. With multiple bootstrap replicates of the average difference in costs and effects in the incremental cost-effectiveness plane we will express the uncertainty of our cost-effectiveness analysis.

The cost-effectivity analysis will be performed with a 1-year time horizon. We use the three-level EQ-5D questionnaire (Euroqol, Rotterdam, the Netherlands) to calculate QALYs as the area under the curve of the utility scores measured over 12 months, according to the Dutch pricing system. The analysis will be based on indirect costs and direct costs and will be determined using the PRODISQ questionnaire. The PRODISQ questionnaire is taken at baseline and every 3 months thereafter up until 1 year.

### 6.3. Data of excluded patients due to COVID-19

We are of opinion that in the current situation the trial load for patients no longer participating is too heavy and thus unethical. Therefore, in these patients, data collection will be limited to the

primary outcome measure, AOFAS at 26 weeks (1x 10 min by videoconsult). Baseline data, AOFAS at 26 weeks and any other data acquired while the verdict of the IRB was awaited will be presented descriptively. Data of the 12 new inclusions will be analysed according to protocol, as if they belonged to the original 100 inclusions.

#### 6.4. Missing Data

Missing items of a score will be handled according to the instructions of the specific scales. In the event of no instructions, we will calculate the percentage of missing items on a scale. Due to the potential impact on trial conclusions, multiple imputation (if >10% missing items on a scale) will be applied. Multiple imputation will be based on age, sex, allocation and earlier scores in the appropriate scale. Single imputation by last observation carried forward (LOCF) will be applied if the missing data is within 10 weeks of the last observation. Argumentation for application of LOCF will be presented descriptively. Little's Missing Completely at Random (MCAR) test will be performed in order to allow us to assume that the missing data is "missing at random" (MAR). Due to the potential impact on trial conclusions, a sensitivity analysis will be performed if missing data is more than 5%.

#### 6.5. Statistical software

Analysis will be performed in IBM SPSS statistics for windows.

## 7. References to literature, standard operating procedures and reporting guidelines

### 7.1. Data Management Plan

The current data management plan is called: “RDM F01 Data Management Plan\_version 1\_01102018” Version 1; dated 1-10-2018 in the digital trial master file (G:\divb\orthopedie\orca\PRIMA-study\PRIMA Trial\16. Data Management\16.1 Forms and documentation).

### 7.2. Data storage

Following extraction from CASTORredc, the syntax files will be stored at the digital location

G:\divb\orthopedie\orca\PRIMA-study\7.2. Standard Operating Procedure

The Standard Operating Procedure (SOP) will be followed when using and analysing the data.

File name: SOP RDM001 Research data management v3.0

Location: G:\divb\orthopedie\orca\PRIMA-study\PRIMA Trial\15. Monitoring-Audits

### 7.3. Reporting Guidelines

Results of the PRIMA trial will be presented in accordance with the CONSolidation Standards Of Reporting Trials (CONSORT) guidelines.

## 8. References

1. Paget LDA, Bierma-Zeinstra SMA, Goedegebuure S, et al. Platelet-Rich plasma Injection



- Management for Ankle osteoarthritis study (PRIMA): Protocol of a Dutch multicentre, stratified, block-randomised, double-blind, placebo-controlled trial. *BMJ Open*. 2019. doi:10.1136/bmjopen-2019-030961
2. Pham T, van der Heijde D, Altman RD, et al. OMERACT-OARSI initiative: Osteoarthritis research society international set of responder criteria for osteoarthritis clinical trials revisited. *Osteoarthr Cartil*. 2004. doi:10.1016/j.joca.2004.02.001
  3. Rozendaal RM, Koes BW, Van Osch GJVM, et al. Effect of glucosamine sulfate on hip osteoarthritis: A randomized trial. *Ann Intern Med*. 2008. doi:10.7326/0003-4819-148-4-200802190-00005
  4. de Vos RJ, Weir A, van Schie HTM, et al. Platelet-rich plasma injection for chronic Achilles tendinopathy: a randomized controlled trial. *JAMA*. 2010;303(2):144-149. doi:10.1001/jama.2009.1986
  5. DeGroot H, Uzunishvili S, Weir R, Al-omari A, Gomes B. Intra-articular injection of hyaluronic acid is not superior to saline solution injection for ankle arthritis: a randomized, double-blind, placebo-controlled study. *J Bone Joint Surg Am*. 2012;94(1):2-8. doi:10.2106/JBJS.J.01763
  6. Fergusson D, Aaron SD, Guyatt G, Hébert P. Post-randomisation exclusions: The intention to treat principle and excluding patients from analysis. *Br Med J*. 2002. doi:10.1136/bmj.325.7365.652
  7. Yelland LN, Sullivan TR, Voysey M, Lee KJ, Cook JA, Forbes AB. Applying the intention-to-treat principle in practice: Guidance on handling randomisation errors. In: *Clinical Trials*. ; 2015. doi:10.1177/1740774515588097
  8. Järvinen TLN, Sihvonen R, Bhandari M, et al. Blinded interpretation of study results can feasibly and effectively diminish interpretation bias. *J Clin Epidemiol*. 2014;67(7):769-772. doi:10.1016/j.jclinepi.2013.11.011

9. van Dijk CN, Verhagen R a, Tol JL. Arthroscopy for problems after ankle fracture. *J Bone Jt Surg.* 1997;79-B(2):280-284. doi:10.1302/0301-620X.79B2.7153
10. Barg A, Harris MD, Henninger HB, et al. Medial distal tibial angle: Comparison between weightbearing mortise view and hindfoot alignment view. *Foot Ankle Int.* 2012. doi:10.3113/FAI.2012.0655
11. Moon JS, Shim JC, Suh JS, Lee WC. Radiographic predictability of cartilage damage in medial ankle osteoarthritis. *Clin Orthop Relat Res.* 2010. doi:10.1007/s11999-010-1352-2
12. Stufkens SA, Barg A, Bolliger L, Stucinskas J, Knupp M, Hintermann B. Measurement of the medial distal tibial angle. *Foot Ankle Int.* 2011. doi:10.3113/FAI.2011.0288
13. Knupp M, Stufkens SAS, Bolliger L, Barg A, Hintermann B. Classification and treatment of supramalleolar deformities. *Foot Ankle Int.* 2011. doi:10.3113/FAI.2011.1023
14. Holzer N, Salvo D, Marijnissen ACA, et al. Radiographic evaluation of posttraumatic osteoarthritis of the ankle: The Kellgren-Lawrence scale is reliable and correlates with clinical symptoms. *Osteoarthr Cartil.* 2015. doi:10.1016/j.joca.2014.11.010
15. Tanaka Y, Takakura Y, Hayashi K, Taniguchi A, Kumai T, Sugimoto K. Low tibial osteotomy for varus-type osteoarthritis of the ankle. *J Bone Jt Surg - Ser B.* 2006. doi:10.1302/0301-620X.88B7.17325
16. Takakura Y, Tanaka Y, Kumai T, Tamai S. Low tibial osteotomy for osteoarthritis of the ankle. Results of a new operation in 18 patients. *J Bone Jt Surg - Ser B.* 1995. doi:10.1302/0301-620x.77b1.7822395
17. Xing D, Wang B, Zhang W, et al. Intra-articular platelet-rich plasma injections for knee osteoarthritis: An overview of systematic reviews and risk of bias considerations. *Int J Rheum Dis.* 2017;20(11):1612-1630. doi:10.1111/1756-185X.13233

18. De Boer AS, Tjioe RJC, Van Der Sijde F, et al. The American Orthopaedic Foot and Ankle Society Ankle-Hindfoot Scale; Translation and validation of the Dutch language version for ankle fractures. *BMJ Open*. 2017;7(8):1-12. doi:10.1136/bmjopen-2017-017040
19. Kitaoka HB, Alexander IJ, Adelaar RS, Nunley JA, Myerson MS, Sanders M. Clinical rating systems for the ankle-hindfoot, midfoot, hallux, and lesser toes. *Foot ankle Int*. 1994;15(7):349-353. doi:10.1177/107110079401500701
20. Sayyed-Hosseini S-H, Hassankhani GG, Bagheri F, Alavi N, Shojaie B, Mousavian A. Validation of the Persian Version of the American Orthopedic Foot and Ankle Society Score (AOFAS) Questionnaire. *Arch bone Jt Surg*. 2018;6(3):233-239. doi:10.1097/PHM.0000000000000234
21. Vosoughi AR, Roustaei N, Mahdaviazad H. American Orthopaedic Foot and Ankle Society ankle-hindfoot scale: A cross-cultural adaptation and validation study from Iran. *Foot Ankle Surg*. 2018. doi:10.1016/j.fas.2017.02.007
22. Domsic RT, Saltzman CL. Ankle osteoarthritis scale. *Foot Ankle Int*. 1998. doi:10.1177/107110079801900708
23. Roos EM, Brandsson S, Karlsson J. Validation of the foot and ankle outcome score for ankle ligament reconstruction. *Foot Ankle Int*. 2001. doi:10.1177/107110070102201004
24. Van Lieshout EMM, De Boer AS, Meuffels DE, et al. American Orthopaedic Foot and Ankle Society (AOFAS) Ankle-Hindfoot Score: A study protocol for the translation and validation of the Dutch language version. *BMJ Open*. 2017. doi:10.1136/bmjopen-2016-012884
25. Halasi T, Kynsburg Á, Tállay A, Berkes I. Development of a new activity score for the evaluation of ankle instability. *Am J Sports Med*. 2004. doi:10.1177/0363546503262181
26. Ware JE, Snow KK, Kosinski M, Gandek B. SF-36 Health Survey Manual and Interpretation Guide. *Bost New Engl Med Cent*. 1993.

27. Kiresuk TJ, Sherman RE. Goal attainment scaling: A general method for evaluating comprehensive community mental health programs. *Community Ment Health J.* 1968.  
doi:10.1007/BF01530764
28. Lamers LM, Stalmeier PFM, McDonnell J, Krabbe PFM, van Busschbach JJ. [Measuring the quality of life in economic evaluations: the Dutch EQ-5D tariff]. *Ned Tijdschr Geneeskd.* 2005.
29. Koopmanschap MA. PRODISQ: A modular questionnaire on productivity and disease for economic evaluation studies. *Expert Rev Pharmacoeconomics Outcomes Res.* 2005.  
doi:10.1586/14737167.5.1.23

## Summary of Changes Statistical Analysis Plan

| Update statistical analysis plan version | Protocol version | Section number(s) changed | Description of and reason for changes<br>(highlighted in version 3.0 in yellow)                                                                                                                                                                                                                                                                               |
|------------------------------------------|------------------|---------------------------|---------------------------------------------------------------------------------------------------------------------------------------------------------------------------------------------------------------------------------------------------------------------------------------------------------------------------------------------------------------|
| 1.0                                      | 4                | 0                         | 0                                                                                                                                                                                                                                                                                                                                                             |
| 2.0                                      | 5                | 3.8<br>6.3                | Amendment due to COVID-19 pandemic: During the COVID-19 pandemic, 12 patients received their first intervention (intra-articular injection), but these patients had no access to receiving their second injection at the pre-defined 6 week time interval. Participation of these 12 patients was discontinued and they were replaced with 12 new inclusions. |
| 3.0                                      | 5                | 6.1                       | Additional radiological baselines variables (whether x-ray is weighted or nonweighted, Medial distal tibial angle, talar tilt, van Dijk classification, Kellgren-Lawrence classification and the Takakura classification at inclusion) to weigh as potential confounders                                                                                      |
