# Supplementary material
Source: PubMed Central journal article supplement (PMC8548954)
Supplement: jama-e2116602-s003.pdf [file jama-e2116602-s003.pdf]

\*Indicates required information. Only first name, last name, and suffix will appear in PubMed.

| <b>*Group Name(s): PRIMA Study Group</b> |                   |                              |                  |                                                                                                                             |                                          |                                                         |                                                                                            |
|------------------------------------------|-------------------|------------------------------|------------------|-----------------------------------------------------------------------------------------------------------------------------|------------------------------------------|---------------------------------------------------------|--------------------------------------------------------------------------------------------|
| <b>*First Name and Middle Initial(s)</b> | <b>*Last Name</b> | <b>*Suffix (eg, Jr, III)</b> | Academic Degrees | Institution                                                                                                                 | Location (city, state/province, country) | Role or Contribution, eg, chair, principal investigator | Group (if more than 1 Group listed in the byline) and/or Subgroup (eg, Steering Committee) |
| Simon                                    | Goedegebuure      |                              | MD               | The Sport Physician Group, Department of Sports Medicine, OLVG                                                              | Amsterdam, the Netherlands               | Principal Investigator                                  | PRIMA Study Group                                                                          |
| Rover                                    | Krips             |                              | MD, PhD          | Department of Orthopedic Surgery, Flevoziekenhuis                                                                           | Almere, the Netherlands                  | Principal Investigator                                  | PRIMA Study Group                                                                          |
| Peter A.                                 | Nolte             |                              | MD, PhD          | Department of Orthopedic Surgery, Spaarne Gasthuis                                                                          | Hoofddorp, the Netherlands               | Principal Investigator                                  | PRIMA Study Group                                                                          |
| Mario                                    | Maas              |                              | MD, PhD          | Amsterdam UMC, University of Amsterdam, Department of Radiology and Nuclear Medicine, Division of Musculoskeletal Radiology | Amsterdam, the Netherlands               | PRIMA Study Group member                                | PRIMA Study Group                                                                          |
| Duncan E.                                | Meuffels          |                              | MD, PhD          | Department of Orthopedic Surgery and Sports Medicine, Erasmus University Medical Center                                     | Rotterdam, the Netherlands               | PRIMA Study Group member                                | PRIMA Study Group                                                                          |
