# Supplementary material
Source: PubMed Central journal article supplement (PMC8548954)
Supplement: jama-e2116602-s004.pdf [file jama-e2116602-s004.pdf]

## Data Sharing Statement

### Data

**Data available:** Yes

**Data types:** Deidentified participant data

**How to access data:** [l.d.paget@amsterdamumc.nl](mailto:l.d.paget@amsterdamumc.nl)

**When available:** With publication

### Supporting Documents

**Document types:** None

### Additional Information

**Who can access the data:** Data will be shared, wherever legally and ethically possible and in line with ICMJE guidelines, with researchers who provide a methodologically sound proposal. Any proposal should contain: title, background, rationale, objective, methods (eligibility criteria, variables and timeframe of interest, statistical plan), information regarding publication including authorship.

**Types of analyses:** Any purpose

**Mechanisms of data availability:** Data will be shared, wherever legally and ethically possible and in line with ICMJE guidelines, with researchers who provide a methodologically sound proposal.

**Any additional restrictions:** Any proposal should contain: title, background, rationale, objective, methods (eligibility criteria, variables and timeframe of interest, statistical plan), information regarding publication including authorship.
